# Supplementary material for: Cumulative Effects of Non-Aflatoxigenic Aspergillus flavus Volatile Organic Compounds to Abate Toxin Production by Mycotoxigenic Aspergilli
Source: MDPI journal article supplement (doi:10.3390/toxins14050340), 2022-05-13
Supplement: s1 [file s1]

# Supplementary Materials: Cumulative Effects of Non-Aflatoxigenic *Aspergillus flavus* Volatile Organic Compounds to Abate Toxin Production by Mycotoxigenic *Aspergilli*

**Table S1.** Average growth (mm) assessed for each LA Strain and VOC treatment.

| Treatment <sup>1</sup> | Growth <sup>2</sup> | Percent Change <sup>3</sup> |
|------------------------|---------------------|-----------------------------|
| <b>LA1 (SRRC 1588)</b> |                     |                             |
| Control                | 80.2 (1)            | N/A                         |
| 3.D_5                  | 80.6 (5)            | <1% inc.                    |
| 3.D_10                 | 79.3 (3.4)          | 1% dec.                     |
| 3.D_20                 | 83.9 (4.7)          | 5% inc.                     |
| 2.D_5                  | 80.6 (4)            | <1% inc.                    |
| 2.D_10                 | 79.4 (4.4)          | 1% dec.                     |
| 2.D_20                 | 81.5 (6.4)          | 2% inc.                     |
| 2.3_5                  | 87.9 (0.3)          | 9% inc.                     |
| 2.3_10                 | 80.5 (4.6)          | <1% inc.                    |
| 2.3_20                 | 72.2 (13.6)         | 10% dec.                    |
| 2.3.D_7.5              | 79.3 (4.6)          | 1% dec.                     |
| 2.3.D_15               | 73.9 (6.5)          | 8% dec.                     |
| 2.3.D_30               | 78.7 (5.6)          | 2% dec.                     |
| <b>LA2 (SRRC 573)</b>  |                     |                             |
| Control                | 78.6 (1.6)          | N/A                         |
| 3.D_5                  | 87.3 (4.6)          | 11% inc.                    |
| 3.D_10                 | 87.8 (3.2)          | 12% inc.                    |
| 3.D_20                 | 86.1 (2.7)          | 10% inc.                    |
| 2.D_5                  | 87.8 (4.8)          | 12% inc.                    |
| 2.D_10                 | 83 (2.3)            | 6% inc.                     |
| 2.D_20                 | 89 (2.1)            | 13% inc.                    |
| 2.3_5                  | 83.9 (0.5)          | 6% inc.                     |
| 2.3_10                 | 74.4 (11.3)         | 5% dec.                     |
| 2.3_20                 | 68.1 (13.1)         | 13% dec.                    |
| 2.3.D_15               | 77.7 (0.1)          | 1% dec.                     |
| 2.3.D_7.5              | 77 (1.6)            | 2% dec.                     |
| 2.3.D_30               | 74.8 (3.2)          | 5% dec.                     |
| <b>LA3 (SRRC 587)</b>  |                     |                             |
| Control                | 84 (2.6)            | N/A                         |
| 3.D_5                  | 78.9 (4.3)          | 7% dec.                     |
| 3.D_10                 | 86 (2.3)            | 2% inc.                     |
| 3.D_20                 | 88.7 (3.6)          | 6% inc.                     |
| 2.D_5                  | 83.6 (2.9)          | <1% dec.                    |
| 2.D_10                 | 83.1 (4.2)          | 1% dec.                     |
| 2.D_20                 | 84.4 (1.6)          | <1% inc.                    |
| 2.3_5                  | 87.1 (0.5)          | 4% inc.                     |

|                       |             |          |
|-----------------------|-------------|----------|
| 2.3_10                | 73.1 (13.9) | 13% dec. |
| 2.3_20                | 70.9 (15)   | 16% dec. |
| 2.3.D_7.5             | 80.5 (1)    | 4% dec.  |
| 2.3.D_15              | 80.4 (0.4)  | 4% dec.  |
| 2.3.D_30              | 80.9 (0.4)  | 4% dec.  |
| <b>LA4 (SRRC 594)</b> |             |          |
| Control               | 75.1 (9.1)  | N/A      |
| 3.D_5                 | 88.3 (1.6)  | 17% inc. |
| 3.D_10                | 88.3 (1.2)  | 18% inc. |
| 3.D_20                | 88.9 (0.8)  | 18% inc. |
| 2.D_5                 | 86.3 (2)    | 15% inc. |
| 2.D_10                | 85.2 (3.3)  | 13% inc. |
| 2.D_20                | 79.6 (6.8)  | 6% inc.  |
| 2.3_5                 | 84.4 (0.8)  | 12% inc. |
| 2.3_10                | 70.6 (10.5) | 6% dec.  |
| 2.3_20                | 73 (10.1)   | 3% dec.  |
| 2.3.D_7.5             | 82.5 (1.2)  | 10% inc. |
| 2.3.D_15              | 83.1 (0.9)  | 11% inc. |
| 2.3.D_30              | 83.1 (1.6)  | 11% inc. |

<sup>1</sup> VOC combinations (2 = 2,3-dihydrofuran, 3 = 3-octanone, D = decane) and total volumes for each treatment (in  $\mu$ l). Control = growth observed when no VOC combinations were used.

<sup>2</sup> Average colony diameters (in mm) across three replicate plates assessed for each VOC treatment. The number in parentheses is the standard deviation from the mean.

<sup>3</sup> Percent (%) change in growth from the control value. dec. = decrease; inc. = increase. N/A indicates no value could be assessed.

**Table S2.** Results of two-way ANOVA and Tukey's test comparing LA1 control growth with each VOC combination treatment.

| <b>3.D ANOVA</b>       | <b>SS (Type III)<sup>a</sup></b> | <b>DF<sup>b</sup></b>                 | <b>MS<sup>c</sup></b>   | <b>F (DFn, DFd)<sup>d</sup></b> | <b>P value</b>          |
|------------------------|----------------------------------|---------------------------------------|-------------------------|---------------------------------|-------------------------|
| Replicate              | 14.64                            | 2                                     | 7.318                   | F (2, 6) = 0.4174               | 0.6765                  |
| Treatment              | 36.50                            | 3                                     | 12.17                   | F (3, 6) = 0.6939               | 0.5886                  |
| <b>3.D Tukey's</b>     | <b>Mean Diff.<sup>e</sup></b>    | <b>95.00% CI of diff.<sup>f</sup></b> | <b>Below threshold?</b> | <b>Summary<sup>g</sup></b>      | <b>Adjusted P Value</b> |
| Control vs. 3.D_5      | -0.3833                          | -12.22 to 11.45                       | No                      | ns                              | 0.9994                  |
| Control vs. 3.D_10     | 0.9267                           | -10.91 to 12.76                       | No                      | ns                              | 0.9923                  |
| Control vs. 3.D_20     | -3.693                           | -15.53 to 8.141                       | No                      | ns                              | 0.7131                  |
| 3.D_5 vs. 3.D_10       | 1.310                            | -10.52 to 13.14                       | No                      | ns                              | 0.9791                  |
| 3.D_5 vs. 3.D_20       | -3.310                           | -15.14 to 8.525                       | No                      | ns                              | 0.7717                  |
| 3.D_10 vs. 3.D_20      | -4.620                           | -16.45 to 7.215                       | No                      | ns                              | 0.5677                  |
| <b>2.D ANOVA</b>       | <b>SS (Type III)<sup>a</sup></b> | <b>DF<sup>b</sup></b>                 | <b>MS<sup>c</sup></b>   | <b>F (DFn, DFd)<sup>d</sup></b> | <b>P value</b>          |
| Replicate              | 87.88                            | 2                                     | 43.94                   | F (2, 6) = 4.039                | 0.0774                  |
| Treatment              | 6.784                            | 3                                     | 2.261                   | F (3, 6) = 0.2079               | 0.8874                  |
| <b>2.D Tukey's</b>     | <b>Mean Diff.<sup>e</sup></b>    | <b>95.00% CI of diff.<sup>f</sup></b> | <b>Below threshold?</b> | <b>Summary<sup>g</sup></b>      | <b>Adjusted P Value</b> |
| Control vs. 2.D_5      | -0.3567                          | -9.679 to 8.966                       | No                      | ns                              | 0.9991                  |
| Control vs. 2.D_10     | 0.7867                           | -8.536 to 10.11                       | No                      | ns                              | 0.9904                  |
| Control vs. 2.D_20     | -1.307                           | -10.63 to 8.016                       | No                      | ns                              | 0.9596                  |
| 2.D_5 vs. 2.D_10       | 1.143                            | -8.179 to 10.47                       | No                      | ns                              | 0.9721                  |
| 2.D_5 vs. 2.D_20       | -0.9500                          | -10.27 to 8.373                       | No                      | ns                              | 0.9835                  |
| 2.D_10 vs. 2.D_20      | -2.093                           | -11.42 to 7.229                       | No                      | ns                              | 0.8621                  |
| <b>2.3 ANOVA</b>       | <b>SS (Type III)<sup>a</sup></b> | <b>DF<sup>b</sup></b>                 | <b>MS<sup>c</sup></b>   | <b>F (DFn, DFd)<sup>d</sup></b> | <b>P value</b>          |
| Replicate              | 2.491                            | 2                                     | 1.245                   | F (2, 6) = 0.09151              | 0.9138                  |
| Treatment              | 235.3                            | 3                                     | 78.44                   | F (3, 6) = 5.764                | 0.0336                  |
| <b>2.3 Tukey's</b>     | <b>Mean Diff.<sup>e</sup></b>    | <b>95.00% CI of diff.<sup>f</sup></b> | <b>Below threshold?</b> | <b>Summary<sup>g</sup></b>      | <b>Adjusted P Value</b> |
| Control vs. 2.3_5      | -7.687                           | -18.11 to 2.740                       | No                      | ns                              | 0.1476                  |
| Control vs. 2.3_10     | -0.3100                          | -10.74 to 10.12                       | No                      | ns                              | 0.9996                  |
| Control vs. 2.3_20     | 4.690                            | -5.737 to 15.12                       | No                      | ns                              | 0.4643                  |
| 2.3_5 vs. 2.3_10       | 7.377                            | -3.050 to 17.80                       | No                      | ns                              | 0.1671                  |
| 2.3_5 vs. 2.3_20       | 12.38                            | 1.950 to 22.80                        | Yes                     | *                               | 0.0243                  |
| 2.3_10 vs. 2.3_20      | 5.000                            | -5.427 to 15.43                       | No                      | ns                              | 0.4168                  |
| <b>2.3.D ANOVA</b>     | <b>SS (Type III)<sup>a</sup></b> | <b>DF<sup>b</sup></b>                 | <b>MS<sup>c</sup></b>   | <b>F (DFn, DFd)<sup>d</sup></b> | <b>P value</b>          |
| Replicate              | 0.6254                           | 2                                     | 0.3127                  | F (2, 6) = 0.009870             | 0.9902                  |
| Treatment              | 71.02                            | 3                                     | 23.67                   | F (3, 6) = 0.7471               | 0.5623                  |
| <b>2.3.D Tukey's</b>   | <b>Mean Diff.<sup>e</sup></b>    | <b>95.00% CI of diff.<sup>f</sup></b> | <b>Below threshold?</b> | <b>Summary<sup>g</sup></b>      | <b>Adjusted P Value</b> |
| Control vs. 2.3.D_7.5  | 0.8533                           | -15.06 to 16.76                       | No                      | ns                              | 0.9975                  |
| Control vs. 2.3.D_15   | 6.260                            | -9.650 to 22.17                       | No                      | ns                              | 0.5621                  |
| Control vs. 2.3.D_30   | 1.460                            | -14.45 to 17.37                       | No                      | ns                              | 0.9878                  |
| 2.3.D_7.5 vs. 2.3.D_15 | 5.407                            | -10.50 to 21.32                       | No                      | ns                              | 0.6614                  |
| 2.3.D_7.5 vs. 2.3.D_30 | 0.6067                           | -15.30 to 16.52                       | No                      | ns                              | 0.9991                  |
| 2.3.D_15 vs. 2.3.D_30  | -4.800                           | -20.71 to 11.11                       | No                      | ns                              | 0.7322                  |

<sup>a</sup> Partial (non-sequential) Sum of Squares. <sup>b</sup> Degrees of Freedom <sup>c</sup> Mean Squares <sup>d</sup> F ratios based on Degrees of Freedom. n = numerator, d = denominator <sup>e</sup> Difference from the control mean. Negative values indicate enhanced growth and positive values indicate reduced growth. <sup>f</sup> Confidence interval (CI) of difference from control <sup>g</sup> Not significant (ns) > 0.05, \*  $P \leq 0.05$ , \*\*  $P \leq 0.01$ , \*\*\*  $P \leq 0.001$ , \*\*\*\*  $P \leq 0.0001$ .

**Table S3.** Results of two-way ANOVA and Tukey's test comparing LA2 control growth with each VOC combination treatment.

| <b>3.D ANOVA</b>       | <b>SS (Type III)<sup>a</sup></b> | <b>DF<sup>b</sup></b>                 | <b>MS<sup>c</sup></b>   | <b>F (DFn, DFd)<sup>d</sup></b> | <b>P value</b>          |
|------------------------|----------------------------------|---------------------------------------|-------------------------|---------------------------------|-------------------------|
| Replicate              | 3.164                            | 2                                     | 1.582                   | F (2, 6) = 0.1219               | 0.8874                  |
| Treatment              | 166.0                            | 3                                     | 55.32                   | F (3, 6) = 4.261                | 0.0621                  |
| <b>3.D Tukey's</b>     | <b>Mean Diff.<sup>e</sup></b>    | <b>95.00% CI of diff.<sup>f</sup></b> | <b>Below threshold?</b> | <b>Summary<sup>g</sup></b>      | <b>Adjusted P Value</b> |
| Control vs. 3.D_5      | -8.717                           | -18.90 to 1.468                       | No                      | ns                              | 0.0899                  |
| Control vs. 3.D_10     | -9.197                           | -19.38 to 0.9877                      | No                      | ns                              | 0.0741                  |
| Control vs. 3.D_20     | -7.487                           | -17.67 to 2.698                       | No                      | ns                              | 0.1489                  |
| 3.D_5 vs. 3.D_10       | -0.4800                          | -10.66 to 9.704                       | No                      | ns                              | 0.9983                  |
| 3.D_5 vs. 3.D_20       | 1.230                            | -8.954 to 11.41                       | No                      | ns                              | 0.9733                  |
| 3.D_10 vs. 3.D_20      | 1.710                            | -8.474 to 11.89                       | No                      | ns                              | 0.9342                  |
| <b>2.D ANOVA</b>       | <b>SS (Type III)<sup>a</sup></b> | <b>DF<sup>b</sup></b>                 | <b>MS<sup>c</sup></b>   | <b>F (DFn, DFd)<sup>d</sup></b> | <b>P value</b>          |
| Replicate              | 5.056                            | 2                                     | 2.528                   | F (2, 6) = 0.2335               | 0.7986                  |
| Treatment              | 205.2                            | 3                                     | 68.39                   | F (3, 6) = 6.317                | 0.0275                  |
| <b>2.D Tukey's</b>     | <b>Mean Diff.<sup>e</sup></b>    | <b>95.00% CI of diff.<sup>f</sup></b> | <b>Below threshold?</b> | <b>Summary<sup>g</sup></b>      | <b>Adjusted P Value</b> |
| Control vs. 2.D_5      | -9.153                           | -18.45 to 0.1467                      | No                      | ns                              | 0.0533                  |
| Control vs. 2.D_10     | -4.363                           | -13.66 to 4.937                       | No                      | ns                              | 0.4329                  |
| Control vs. 2.D_20     | -10.45                           | -19.75 to -1.147                      | Yes                     | *                               | 0.0309                  |
| 2.D_5 vs. 2.D_10       | 4.790                            | -4.510 to 14.09                       | No                      | ns                              | 0.3646                  |
| 2.D_5 vs. 2.D_20       | -1.293                           | -10.59 to 8.007                       | No                      | ns                              | 0.9605                  |
| 2.D_10 vs. 2.D_20      | -6.083                           | -15.38 to 3.217                       | No                      | ns                              | 0.2086                  |
| <b>2.3 ANOVA</b>       | <b>SS (Type III)<sup>a</sup></b> | <b>DF<sup>b</sup></b>                 | <b>MS<sup>c</sup></b>   | <b>F (DFn, DFd)<sup>d</sup></b> | <b>P value</b>          |
| Replicate              | 15.92                            | 2                                     | 7.959                   | F (2, 6) = 2.042                | 0.2106                  |
| Treatment              | 112.7                            | 3                                     | 37.57                   | F (3, 6) = 9.638                | 0.0104                  |
| <b>2.3 Tukey's</b>     | <b>Mean Diff.<sup>e</sup></b>    | <b>95.00% CI of diff.<sup>f</sup></b> | <b>Below threshold?</b> | <b>Summary<sup>g</sup></b>      | <b>Adjusted P Value</b> |
| Control vs. 2.3_5      | -5.263                           | -10.84 to 0.3168                      | No                      | ns                              | 0.0628                  |
| Control vs. 2.3_10     | -0.1633                          | -5.743 to 5.417                       | No                      | ns                              | 0.9996                  |
| Control vs. 2.3_20     | 3.310                            | -2.270 to 8.890                       | No                      | ns                              | 0.2678                  |
| 2.3_5 vs. 2.3_10       | 5.100                            | -0.4801 to 10.68                      | No                      | ns                              | 0.0708                  |
| 2.3_5 vs. 2.3_20       | 8.573                            | 2.993 to 14.15                        | Yes                     | **                              | 0.0072                  |
| 2.3_10 vs. 2.3_20      | 3.473                            | -2.107 to 9.053                       | No                      | ns                              | 0.2377                  |
| <b>2.3.D ANOVA</b>     | <b>SS (Type III)<sup>a</sup></b> | <b>DF<sup>b</sup></b>                 | <b>MS<sup>c</sup></b>   | <b>F (DFn, DFd)<sup>d</sup></b> | <b>P value</b>          |
| Replicate              | 2.929                            | 2                                     | 1.465                   | F (2, 6) = 0.3147               | 0.7414                  |
| Treatment              | 23.98                            | 3                                     | 7.993                   | F (3, 6) = 1.717                | 0.2622                  |
| <b>2.3.D Tukey's</b>   | <b>Mean Diff.<sup>e</sup></b>    | <b>95.00% CI of diff.<sup>f</sup></b> | <b>Below threshold?</b> | <b>Summary<sup>g</sup></b>      | <b>Adjusted P Value</b> |
| Control vs. 2.3.D_7.5  | 1.620                            | -4.478 to 7.718                       | No                      | ns                              | 0.7961                  |
| Control vs. 2.3.D_15   | 0.9333                           | -5.165 to 7.031                       | No                      | ns                              | 0.9486                  |
| Control vs. 2.3.D_30   | 3.833                            | -2.265 to 9.931                       | No                      | ns                              | 0.2317                  |
| 2.3.D_7.5 vs. 2.3.D_15 | -0.6867                          | -6.785 to 5.411                       | No                      | ns                              | 0.9781                  |
| 2.3.D_7.5 vs. 2.3.D_30 | 2.213                            | -3.885 to 8.311                       | No                      | ns                              | 0.6182                  |
| 2.3.D_15 vs. 2.3.D_30  | 2.900                            | -3.198 to 8.998                       | No                      | ns                              | 0.4229                  |

<sup>a</sup> Partial (non-sequential) Sum of Squares <sup>b</sup> Degrees of Freedom <sup>c</sup> Mean Squares <sup>d</sup> F ratios based on Degrees of Freedom. n = numerator, d = denominator <sup>e</sup> Difference from the control mean. Negative values indicate enhanced growth and positive values indicate reduced growth. <sup>f</sup> Confidence interval (CI) of difference from control <sup>g</sup> Not significant (ns) > 0.05, \*  $P \leq 0.05$ , \*\*  $P \leq 0.01$ , \*\*\*  $P \leq 0.001$ , \*\*\*\*  $P \leq 0.0001$ .

**Table S4.** Results of two-way ANOVA and Tukey's test comparing LA3 control growth with each VOC combination treatment.

| <b>3.D ANOVA</b>       | <b>SS (Type III)<sup>a</sup></b> | <b>DF<sup>b</sup></b>                 | <b>MS<sup>c</sup></b>   | <b>F (DFn, DFd)<sup>d</sup></b> | <b>P value</b>          |
|------------------------|----------------------------------|---------------------------------------|-------------------------|---------------------------------|-------------------------|
| Replicate              | 28.67                            | 2                                     | 14.33                   | F (2, 6) = 1.493                | 0.2978                  |
| Treatment              | 154.7                            | 3                                     | 51.57                   | F (3, 6) = 5.370                | 0.0390                  |
| <b>3.D Tukey's</b>     | <b>Mean Diff.<sup>e</sup></b>    | <b>95.00% CI of diff.<sup>f</sup></b> | <b>Below threshold?</b> | <b>Summary<sup>g</sup></b>      | <b>Adjusted P Value</b> |
| Control vs. 3.D_5      | 5.163                            | -3.595 to 13.92                       | No                      | ns                              | 0.2718                  |
| Control vs. 3.D_10     | -1.977                           | -10.74 to 6.782                       | No                      | ns                              | 0.8605                  |
| Control vs. 3.D_20     | -4.640                           | -13.40 to 4.119                       | No                      | ns                              | 0.3445                  |
| 3.D_5 vs. 3.D_10       | -7.140                           | -15.90 to 1.619                       | No                      | ns                              | 0.1065                  |
| 3.D_5 vs. 3.D_20       | -9.803                           | -18.56 to -1.045                      | Yes                     | *                               | 0.0313                  |
| 3.D_10 vs. 3.D_20      | -2.663                           | -11.42 to 6.095                       | No                      | ns                              | 0.7278                  |
| <b>2.D ANOVA</b>       | <b>SS (Type III)<sup>a</sup></b> | <b>DF<sup>b</sup></b>                 | <b>MS<sup>c</sup></b>   | <b>F (DFn, DFd)<sup>d</sup></b> | <b>P value</b>          |
| Replicate              | 28.59                            | 2                                     | 14.30                   | F (2, 6) = 2.001                | 0.2159                  |
| Treatment              | 2.847                            | 3                                     | 0.9490                  | F (3, 6) = 0.1328               | 0.9370                  |
| <b>2.D Tukey's</b>     | <b>Mean Diff.<sup>e</sup></b>    | <b>95.00% CI of diff.<sup>f</sup></b> | <b>Below threshold?</b> | <b>Summary<sup>g</sup></b>      | <b>Adjusted P Value</b> |
| Control vs. 2.D_5      | 0.4033                           | -7.151 to 7.958                       | No                      | ns                              | 0.9975                  |
| Control vs. 2.D_10     | 0.9733                           | -6.581 to 8.528                       | No                      | ns                              | 0.9680                  |
| Control vs. 2.D_20     | -0.3333                          | -7.888 to 7.221                       | No                      | ns                              | 0.9986                  |
| 2.D_5 vs. 2.D_10       | 0.5700                           | -6.985 to 8.125                       | No                      | ns                              | 0.9931                  |
| 2.D_5 vs. 2.D_20       | -0.7367                          | -8.291 to 6.818                       | No                      | ns                              | 0.9855                  |
| 2.D_10 vs. 2.D_20      | -1.307                           | -8.861 to 6.248                       | No                      | ns                              | 0.9288                  |
| <b>2.3 ANOVA</b>       | <b>SS (Type III)<sup>a</sup></b> | <b>DF<sup>b</sup></b>                 | <b>MS<sup>c</sup></b>   | <b>F (DFn, DFd)<sup>d</sup></b> | <b>P value</b>          |
| Replicate              | 22.83                            | 2                                     | 11.41                   | F (2, 6) = 2.541                | 0.1587                  |
| Treatment              | 141.1                            | 3                                     | 47.05                   | F (3, 6) = 10.47                | 0.0085                  |
| <b>2.3 Tukey's</b>     | <b>Mean Diff.<sup>e</sup></b>    | <b>95.00% CI of diff.<sup>f</sup></b> | <b>Below threshold?</b> | <b>Summary<sup>g</sup></b>      | <b>Adjusted P Value</b> |
| Control vs. 2.3_5      | -3.070                           | -9.061 to 2.921                       | No                      | ns                              | 0.3683                  |
| Control vs. 2.3_10     | 4.500                            | -1.491 to 10.49                       | No                      | ns                              | 0.1392                  |
| Control vs. 2.3_20     | 5.383                            | -0.6077 to 11.37                      | No                      | ns                              | 0.0754                  |
| 2.3_5 vs. 2.3_10       | 7.570                            | 1.579 to 13.56                        | Yes                     | *                               | 0.0183                  |
| 2.3_5 vs. 2.3_20       | 8.453                            | 2.462 to 14.44                        | Yes                     | *                               | 0.0109                  |
| 2.3_10 vs. 2.3_20      | 0.8833                           | -5.108 to 6.874                       | No                      | ns                              | 0.9536                  |
| <b>2.3.D ANOVA</b>     | <b>SS (Type III)<sup>a</sup></b> | <b>DF<sup>b</sup></b>                 | <b>MS<sup>c</sup></b>   | <b>F (DFn, DFd)<sup>d</sup></b> | <b>P value</b>          |
| Replicate              | 3.821                            | 2                                     | 1.911                   | F (2, 6) = 0.9050               | 0.4534                  |
| Treatment              | 26.77                            | 3                                     | 8.924                   | F (3, 6) = 4.227                | 0.0631                  |
| <b>2.3.D Tukey's</b>   | <b>Mean Diff.<sup>e</sup></b>    | <b>95.00% CI of diff.<sup>f</sup></b> | <b>Below threshold?</b> | <b>Summary<sup>g</sup></b>      | <b>Adjusted P Value</b> |
| Control vs. 2.3.D_7.5  | 3.523                            | -0.5833 to 7.630                      | No                      | ns                              | 0.0892                  |
| Control vs. 2.3.D_15   | 3.597                            | -0.5100 to 7.703                      | No                      | ns                              | 0.0828                  |
| Control vs. 2.3.D_30   | 3.167                            | -0.9400 to 7.273                      | No                      | ns                              | 0.1281                  |
| 2.3.D_7.5 vs. 2.3.D_15 | 0.07333                          | -4.033 to 4.180                       | No                      | ns                              | > 0.9999                |
| 2.3.D_7.5 vs. 2.3.D_30 | -0.3567                          | -4.463 to 3.750                       | No                      | ns                              | 0.9896                  |
| 2.3.D_15 vs. 2.3.D_30  | -0.4300                          | -4.537 to 3.677                       | No                      | ns                              | 0.9822                  |

<sup>a</sup> Partial (non-sequential) Sum of Squares <sup>b</sup> Degrees of Freedom <sup>c</sup> Mean Squares <sup>d</sup> F ratios based on Degrees of Freedom. n = numerator, d = denominator <sup>e</sup> Difference from the control mean. Negative values indicate enhanced growth and positive values indicate reduced growth. <sup>f</sup> Confidence interval (CI) of difference from control <sup>g</sup> Not significant (ns) > 0.05, \*  $P \leq 0.05$ , \*\*  $P \leq 0.01$ , \*\*\*  $P \leq 0.001$ , \*\*\*\*  $P \leq 0.0001$ .

**Table S5.** Results of two-way ANOVA and Tukey's test comparing LA4 control growth with each VOC combination treatment

| <b>3.D ANOVA</b>       | <b>SS (Type III)<sup>a</sup></b> | <b>DF<sup>b</sup></b>                 | <b>MS<sup>c</sup></b>   | <b>F (DFn, DFd)<sup>d</sup></b> |
|------------------------|----------------------------------|---------------------------------------|-------------------------|---------------------------------|
| Replicate              | 59.28                            | 2                                     | 29.64                   | F (2, 6) = 1.545                |
| Treatment              | 403.1                            | 3                                     | 134.4                   | F (3, 6) = 7.005                |
| <b>3.D Tukey's</b>     | <b>Mean Diff.<sup>e</sup></b>    | <b>95.00% CI of diff.<sup>f</sup></b> | <b>Below threshold?</b> | <b>Summary<sup>g</sup></b>      |
| Control vs. 3.D_5      | -13.19                           | -25.57 to -0.8142                     | Yes                     | *                               |
| Control vs. 3.D_10     | -13.17                           | -25.55 to -0.7942                     | Yes                     | *                               |
| Control vs. 3.D_20     | -13.76                           | -26.14 to -1.378                      | Yes                     | *                               |
| 3.D_5 vs. 3.D_10       | 0.02000                          | -12.36 to 12.40                       | No                      | ns                              |
| 3.D_5 vs. 3.D_20       | -0.5633                          | -12.94 to 11.82                       | No                      | ns                              |
| 3.D_10 vs. 3.D_20      | -0.5833                          | -12.96 to 11.80                       | No                      | ns                              |
| <b>2.D ANOVA</b>       | <b>SS (Type III)<sup>a</sup></b> | <b>DF<sup>b</sup></b>                 | <b>MS<sup>c</sup></b>   | <b>F (DFn, DFd)<sup>d</sup></b> |
| Replicate              | 37.30                            | 2                                     | 18.65                   | F (2, 6) = 0.4489               |
| Treatment              | 243.6                            | 3                                     | 81.21                   | F (3, 6) = 1.955                |
| <b>2.D Tukey's</b>     | <b>Mean Diff.<sup>e</sup></b>    | <b>95.00% CI of diff.<sup>f</sup></b> | <b>Below threshold?</b> | <b>Summary<sup>g</sup></b>      |
| Control vs. 2.D_5      | -11.21                           | -29.43 to 7.004                       | No                      | ns                              |
| Control vs. 2.D_10     | -10.05                           | -28.26 to 8.170                       | No                      | ns                              |
| Control vs. 2.D_20     | -4.453                           | -22.67 to 13.76                       | No                      | ns                              |
| 2.D_5 vs. 2.D_10       | 1.167                            | -17.05 to 19.38                       | No                      | ns                              |
| 2.D_5 vs. 2.D_20       | 6.760                            | -11.46 to 24.98                       | No                      | ns                              |
| 2.D_10 vs. 2.D_20      | 5.593                            | -12.62 to 23.81                       | No                      | ns                              |
| <b>2.3 ANOVA</b>       | <b>SS (Type III)<sup>a</sup></b> | <b>DF<sup>b</sup></b>                 | <b>MS<sup>c</sup></b>   | <b>F (DFn, DFd)<sup>d</sup></b> |
| Replicate              | 180.8                            | 2                                     | 90.40                   | F (2, 6) = 4.211                |
| Treatment              | 182.1                            | 3                                     | 60.72                   | F (3, 6) = 2.828                |
| <b>2.3 Tukey's</b>     | <b>Mean Diff.<sup>e</sup></b>    | <b>95.00% CI of diff.<sup>f</sup></b> | <b>Below threshold?</b> | <b>Summary<sup>g</sup></b>      |
| Control vs. 2.3_5      | -9.310                           | -22.41 to 3.786                       | No                      | ns                              |
| Control vs. 2.3_10     | -0.5233                          | -13.62 to 12.57                       | No                      | ns                              |
| Control vs. 2.3_20     | -0.4500                          | -13.55 to 12.65                       | No                      | ns                              |
| 2.3_5 vs. 2.3_10       | 8.787                            | -4.309 to 21.88                       | No                      | ns                              |
| 2.3_5 vs. 2.3_20       | 8.860                            | -4.236 to 21.96                       | No                      | ns                              |
| 2.3_10 vs. 2.3_20      | 0.07333                          | -13.02 to 13.17                       | No                      | ns                              |
| <b>2.3.D ANOVA</b>     | <b>SS (Type III)<sup>a</sup></b> | <b>DF<sup>b</sup></b>                 | <b>MS<sup>c</sup></b>   | <b>F (DFn, DFd)<sup>d</sup></b> |
| Replicate              | 27.37                            | 2                                     | 13.69                   | F (2, 6) = 0.5564               |
| Treatment              | 136.4                            | 3                                     | 45.45                   | F (3, 6) = 1.848                |
| <b>2.3.D Tukey's</b>   | <b>Mean Diff.<sup>e</sup></b>    | <b>95.00% CI of diff.<sup>f</sup></b> | <b>Below threshold?</b> | <b>Summary<sup>g</sup></b>      |
| Control vs. 2.3.D_7.5  | -7.333                           | -21.35 to 6.685                       | No                      | ns                              |
| Control vs. 2.3.D_15   | -8.000                           | -22.02 to 6.018                       | No                      | ns                              |
| Control vs. 2.3.D_30   | -7.950                           | -21.97 to 6.068                       | No                      | ns                              |
| 2.3.D_7.5 vs. 2.3.D_15 | -0.6667                          | -14.68 to 13.35                       | No                      | ns                              |
| 2.3.D_7.5 vs. 2.3.D_30 | -0.6167                          | -14.63 to 13.40                       | No                      | ns                              |
| 2.3.D_15 vs. 2.3.D_30  | 0.05000                          | -13.97 to 14.07                       | No                      | ns                              |

<sup>a</sup> Partial (non-sequential) Sum of Squares <sup>b</sup> Degrees of Freedom <sup>c</sup> Mean Squares <sup>d</sup> F ratios based on Degrees of Freedom. n = numerator, d = denominator <sup>e</sup> Difference from the control mean. Negative values indicate enhanced growth and positive values indicate reduced growth. <sup>f</sup> Confidence interval (CI) of difference from control <sup>g</sup> Not significant (ns) > 0.05, \*  $P \leq 0.05$ , \*\*  $P \leq 0.01$ , \*\*\*  $P \leq 0.001$ , \*\*\*\*  $P \leq 0.0001$ .

**Table S6.** Average total IDT concentrations assessed for each LA Strain and VOC treatment.

| <b>Treatment<sup>1</sup></b> | <b>Concentration (ppb)<sup>2</sup></b> | <b>Percent Change<sup>3</sup></b> |
|------------------------------|----------------------------------------|-----------------------------------|
| <b>LA1 (SRRC 1588)</b>       |                                        |                                   |
| Control                      | 81538 (7785)                           | N/A                               |
| 3.D_5                        | 64090 (14733)                          | 21% dec.                          |
| 3.D_10                       | 90842 (14852)                          | 11% inc.                          |
| 3.D_20                       | 68187 (31895)                          | 16% dec.                          |
| 2.D_5                        | 72210 (16080)                          | 11% dec.                          |
| 2.D_10                       | 98556 (26232)                          | 21% inc.                          |
| 2.D_20                       | 92787 (15376)                          | 14% inc.                          |
| 2.3_5                        | 81765 (17803)                          | 0.3% inc.                         |
| 2.3_10                       | 69139 (10111)                          | 15% dec.                          |
| 2.3_20                       | 79742 (6426)                           | 2% dec.                           |
| 2.3.D_7.5                    | 43505 (6378)                           | 47% dec.                          |
| 2.3.D_15                     | 64573 (9715)                           | 21% dec.                          |
| 2.3.D_30                     | 49177 (6636)                           | 40% dec.                          |
| <b>LA2 (SRRC 573)</b>        |                                        |                                   |
| Control                      | 280 (164)                              | N/A                               |
| 3.D_5                        | 232 (110)                              | 17% dec.                          |
| 3.D_10                       | 422 (330)                              | 51% inc.                          |
| 3.D_20                       | 216 (54)                               | 23% dec.                          |
| 2.D_5                        | 444 (213)                              | 59% inc.                          |
| 2.D_10                       | 330 (127)                              | 18% inc.                          |
| 2.D_20                       | 432 (296)                              | 54% inc.                          |
| 2.3_5                        | 631 (330)                              | 125% inc.                         |
| 2.3_10                       | 487 (352)                              | 74% inc.                          |
| 2.3_20                       | 785 (877)                              | 180% inc.                         |
| 2.3.D_7.5                    | 242 (107)                              | 14% dec.                          |
| 2.3.D_15                     | 243 (70)                               | 13% dec.                          |
| 2.3.D_30                     | 166 (54)                               | 41% dec.                          |
| <b>LA3 (SRRC 587)</b>        |                                        |                                   |
| Control                      | 65757 (32632)                          | N/A                               |
| 3.D_5                        | 114526 (7388)                          | 74% inc.                          |
| 3.D_10                       | 97115 (9715)                           | 48% inc.                          |
| 3.D_20                       | 92186 (15787)                          | 40% inc.                          |
| 2.D_5                        | 112499 (6430)                          | 71% inc.                          |
| 2.D_10                       | 119401 (27346)                         | 82% inc.                          |
| 2.D_20                       | 88700 (43243)                          | 35% inc.                          |
| 2.3_5                        | 134137 (17392)                         | 104% inc.                         |
| 2.3_10                       | 87617 (60387)                          | 33% inc.                          |
| 2.3_20                       | 91264 (12145)                          | 39% inc.                          |
| 2.3.D_7.5                    | 94123 (3174)                           | 43% inc.                          |
| 2.3.D_15                     | 88565 (11750)                          | 35% inc.                          |
| 2.3.D_30                     | 90477 (4721)                           | 38% inc.                          |
| <b>LA4 (SRRC 594)</b>        |                                        |                                   |
| Control                      | 605 (351)                              | N/A                               |

---

|           |             |            |
|-----------|-------------|------------|
| 3.D_5     | 1376 (862)  | 127% inc.  |
| 3.D_10    | 671 (184)   | 11% inc.   |
| 3.D_20    | 589 (286)   | 3% dec.    |
| 2.D_5     | 1273 (600)  | 110% inc.  |
| 2.D_10    | 1748 (1354) | 189% inc.  |
| 2.D_20    | 605 (302)   | 0.01% dec. |
| 2.3_5     | 502 (49)    | 17% dec.   |
| 2.3_10    | 810 (485)   | 34% inc.   |
| 2.3_20    | 821 (381)   | 36% inc.   |
| 2.3.D_7.5 | 452 (433)   | 25% dec.   |
| 2.3.D_15  | 253 (53)    | 58% dec.   |
| 2.3.D_30  | 207 (18)    | 66% dec.   |

---

<sup>1</sup> VOC combinations (2 = 2,3-dihydrofuran, 3 = 3-octanone, D = decane) and total volumes for each treatment (in µl). Control = toxins detected when no VOC combinations were used.

<sup>2</sup> Average mycotoxin concentrations (in ppb) assessed for each VOC treatment. The number in parentheses is the standard deviation from the mean.

<sup>3</sup> Percent (%) change in mycotoxin production from the control value. dec. = decrease; inc. = increase. N/A indicates no value could be assessed.



**Table S7.** Average AFB<sub>1</sub> concentrations assessed for toxic LA strains and VOC treatments.

| <b>Treatment<sup>1</sup></b> | <b>Concentration (ppb)<sup>2</sup></b> | <b>Percent Change<sup>3</sup></b> |
|------------------------------|----------------------------------------|-----------------------------------|
| <b>LA2 (SRRC 573)</b>        |                                        |                                   |
| Control                      | 20974 (3183)                           | N/A                               |
| 3.D_5                        | 3308 (1219)                            | 84% dec.                          |
| 3.D_10                       | 4570 (1804)                            | 78% dec.                          |
| 3.D_20                       | 8633 (7789)                            | 59% dec.                          |
| 2.D_5                        | 8601 (1658)                            | 59% dec.                          |
| 2.D_10                       | 8350 (1442)                            | 60% dec.                          |
| 2.D_20                       | 9448 (7495)                            | 55% dec.                          |
| 2.3_5                        | 5032 (788)                             | 76% dec.                          |
| 2.3_10                       | 9492 (1746)                            | 55% dec.                          |
| 2.3_20                       | 6541 (3602)                            | 69% dec.                          |
| 2.3.D_7.5                    | 11717 (9443)                           | 44% dec.                          |
| 2.3.D_15                     | 18228 (5649)                           | 13% dec.                          |
| 2.3.D_30                     | 24182 (1547)                           | 15% inc.                          |
| <b>LA3 (SRRC 587)</b>        |                                        |                                   |
| Control                      | 54084 (5384)                           | N/A                               |
| 3.D_5                        | 41709 (7730)                           | 23% dec.                          |
| 3.D_10                       | 52719 (23457)                          | 3% dec.                           |
| 3.D_20                       | 31100 (5135)                           | 43% dec.                          |
| 2.D_5                        | 35236 (10523)                          | 35% dec.                          |
| 2.D_10                       | 48024 (13951)                          | 11% dec.                          |
| 2.D_20                       | 26889 (10667)                          | 50% dec.                          |
| 2.3_5                        | 14447 (2370)                           | 73% dec.                          |
| 2.3_10                       | 5684 (1534)                            | 89% dec.                          |
| 2.3_20                       | 36584 (8308)                           | 32% dec.                          |
| 2.3.D_7.5                    | 24182 (1547)                           | 55% dec.                          |
| 2.3.D_15                     | 24564 (3266)                           | 55% dec.                          |
| 2.3.D_30                     | 34562 (4669)                           | 36% dec.                          |
| <b>LA4 (SRRC 594)</b>        |                                        |                                   |
| Control                      | 164413 (7179)                          | N/A                               |
| 3.D_5                        | 89003 (25905)                          | 46% dec.                          |
| 3.D_10                       | 105741 (22756)                         | 36% dec.                          |
| 3.D_20                       | 89681 (33938)                          | 45% dec.                          |
| 2.D_5                        | 47731 (14367)                          | 71% dec.                          |
| 2.D_10                       | 62356 (21007)                          | 62% dec.                          |
| 2.D_20                       | 52341 (8006)                           | 68% dec.                          |
| 2.3_5                        | 45767 (8293)                           | 72% dec.                          |
| 2.3_10                       | 39070 (8026)                           | 76% dec.                          |
| 2.3_20                       | 36550 (8664)                           | 78% dec.                          |
| 2.3.D_7.5                    | 77114 (12367)                          | 53% dec.                          |
| 2.3.D_15                     | 100837 (18154)                         | 39% dec.                          |
| 2.3.D_30                     | 107254 (9236)                          | 35% dec.                          |

<sup>1</sup> VOC combinations (2 = 2,3-dihydrofuran, 3 = 3-octanone, D = decane) and total volumes for each treatment (in  $\mu\text{l}$ ). Control = toxins detected when no VOC combinations were used. LA1 does not produce this toxin and has been left out of this table.

<sup>2</sup> Average mycotoxin concentrations (ppb) assessed for each VOC treatment. The number in parentheses is the standard deviation from the mean.

<sup>3</sup> Percent (%) change in mycotoxin production from the control value. dec. = decrease; inc. = increase. N/A indicates no value could be assessed.

**Table S8.** Average AFB<sub>2</sub> concentrations assessed for toxic LA strains and VOC treatments.

| <b>Treatment<sup>1</sup></b> | <b>Concentration (ppb)<sup>2</sup></b> | <b>Percent Change<sup>3</sup></b> |
|------------------------------|----------------------------------------|-----------------------------------|
| <b>LA2 (SRRC 573)</b>        |                                        |                                   |
| Control                      | 163 (20)                               | N/A                               |
| 3.D_5                        | 43 (22)                                | 74% dec.                          |
| 3.D_10                       | 69 (18)                                | 58% dec.                          |
| 3.D_20                       | 97 (80)                                | 40% dec.                          |
| 2.D_5                        | 119 (15)                               | 27% dec.                          |
| 2.D_10                       | 131 (40)                               | 20% dec.                          |
| 2.D_20                       | 142 (94)                               | 13% dec.                          |
| 2.3_5                        | 40 (11)                                | 75% dec.                          |
| 2.3_10                       | 112 (40)                               | 31% dec.                          |
| 2.3_20                       | 85 (25)                                | 48% dec.                          |
| 2.3.D_7.5                    | 144 (35)                               | 11% dec.                          |
| 2.3.D_15                     | 160 (82)                               | 1% dec.                           |
| 2.3.D_30                     | 200 (33)                               | 23% inc.                          |
| <b>LA3 (SRRC 587)</b>        |                                        |                                   |
| Control                      | 492 (33)                               | N/A                               |
| 3.D_5                        | 552 (265)                              | 12% inc.                          |
| 3.D_10                       | 855 (748)                              | 74% inc.                          |
| 3.D_20                       | 348 (114)                              | 29% dec.                          |
| 2.D_5                        | 450 (258)                              | 8% dec.                           |
| 2.D_10                       | 645 (349)                              | 31% inc.                          |
| 2.D_20                       | 301 (76)                               | 39% dec.                          |
| 2.3_5                        | 122 (25)                               | 75% dec.                          |
| 2.3_10                       | 296 (121)                              | 40% dec.                          |
| 2.3_20                       | 645 (117)                              | 31% inc.                          |
| 2.3.D_7.5                    | 182 (21)                               | 63% dec.                          |
| 2.3.D_15                     | 183 (47)                               | 63% dec.                          |
| 2.3.D_30                     | 315 (90)                               | 36% dec.                          |
| <b>LA4 (SRRC 594)</b>        |                                        |                                   |
| Control                      | 3435 (737)                             | N/A                               |
| 3.D_5                        | 1947 (624)                             | 44% dec.                          |
| 3.D_10                       | 2286 (565)                             | 34% dec.                          |
| 3.D_20                       | 2074 (966)                             | 40% dec.                          |
| 2.D_5                        | 1200 (380)                             | 65% dec.                          |
| 2.D_10                       | 1426 (584)                             | 59% dec.                          |
| 2.D_20                       | 1273 (359)                             | 63% dec.                          |
| 2.3_5                        | 904 (142)                              | 74% dec.                          |
| 2.3_10                       | 825 (205)                              | 76% dec.                          |
| 2.3_20                       | 848 (132)                              | 76% dec.                          |
| 2.3.D_7.5                    | 1590 (269)                             | 54% dec.                          |
| 2.3.D_15                     | 2020 (414)                             | 42% dec.                          |
| 2.3.D_30                     | 2044 (106)                             | 41% dec.                          |

<sup>1</sup> VOC combinations (2 = 2,3-dihydrofuran, 3 = 3-octanone, D = decane) and total volumes for each treatment (in  $\mu\text{l}$ ). Control = toxins detected when no VOC combinations were used. LA1 does not produce this toxin and has been left out of this table.

<sup>2</sup> Average mycotoxin concentrations (ppb) assessed for each VOC treatment. The number in parentheses is the standard deviation from the mean.

<sup>3</sup> Percent (%) change in mycotoxin production from the control value. dec. = decrease; inc. = increase. N/A indicates no value could be assessed.

**Table S9.** Average CPA concentrations assessed for toxic LA strains and VOC treatments.

| <b>Treatment<sup>1</sup></b> | <b>Concentration (ppm)<sup>2</sup></b> | <b>Percent Change<sup>3</sup></b> |
|------------------------------|----------------------------------------|-----------------------------------|
| <b>LA2 (SRRC 573)</b>        |                                        |                                   |
| Control                      | 1202 (180)                             | N/A                               |
| 3.D_5                        | 316 (13)                               | 74% dec.                          |
| 3.D_10                       | 346 (13)                               | 71% dec.                          |
| 3.D_20                       | 464 (216)                              | 61% dec.                          |
| 2.D_5                        | 564 (274)                              | 53% dec.                          |
| 2.D_10                       | 494 (33)                               | 59% dec.                          |
| 2.D_20                       | 492 (106)                              | 59% dec.                          |
| 2.3_5                        | 147 (36)                               | 88% dec.                          |
| 2.3_10                       | 92 (53)                                | 92% dec.                          |
| 2.3_20                       | 85 (17)                                | 93% dec.                          |
| 2.3.D_7.5                    | 828 (324)                              | 31% dec.                          |
| 2.3.D_15                     | 951 (322)                              | 21% dec.                          |
| 2.3.D_30                     | 675 (457)                              | 44% dec.                          |
| <b>LA3 (SRRC 587)</b>        |                                        |                                   |
| Control                      | 16651 (32)                             | N/A                               |
| 3.D_5                        | 1439 (303)                             | 91% dec.                          |
| 3.D_10                       | 1242 (317)                             | 93% dec.                          |
| 3.D_20                       | 2028 (1279)                            | 88% dec.                          |
| 2.D_5                        | 5487 (698)                             | 67% dec.                          |
| 2.D_10                       | 8970 (5286)                            | 46% dec.                          |
| 2.D_20                       | 6855 (2715)                            | 59% dec.                          |
| 2.3_5                        | 2040 (266)                             | 88% dec.                          |
| 2.3_10                       | 2125 (325)                             | 87% dec.                          |
| 2.3_20                       | 1470 (91)                              | 91% dec.                          |
| 2.3.D_7.5                    | 3379 (131)                             | 80% dec.                          |
| 2.3.D_15                     | 3255 (262)                             | 80% dec.                          |
| 2.3.D_30                     | 3455 (881)                             | 79% dec.                          |
| <b>LA4 (SRRC 594)</b>        |                                        |                                   |
| Control                      | 5157 (400)                             | N/A                               |
| 3.D_5                        | 864 (139)                              | 83% dec.                          |
| 3.D_10                       | 845 (153)                              | 84% dec.                          |
| 3.D_20                       | 728 (12)                               | 86% dec.                          |
| 2.D_5                        | 794 (69)                               | 85% dec.                          |
| 2.D_10                       | 934 (411)                              | 82% dec.                          |
| 2.D_20                       | 862 (134)                              | 83% dec.                          |
| 2.3_5                        | 295 (42)                               | 94% dec.                          |
| 2.3_10                       | 338 (22)                               | 93% dec.                          |
| 2.3_20                       | 272 (28)                               | 95% dec.                          |
| 2.3.D_7.5                    | 1480 (184)                             | 71% dec.                          |
| 2.3.D_15                     | 4677 (1386)                            | 9% dec.                           |
| 2.3.D_30                     | 2449 (880)                             | 53% dec.                          |

<sup>1</sup> VOC combinations (2 = 2,3-dihydrofuran, 3 = 3-octanone, D = decane) and total volumes for each treatment (in  $\mu\text{l}$ ). Control = toxins detected when no VOC combinations were used. LA1 does not produce this toxin and has been left out of this table.

<sup>2</sup> Average mycotoxin concentrations (ppm) assessed for each VOC treatment. The number in parentheses is the standard deviation from the mean.

<sup>3</sup> Percent (%) change in mycotoxin production from the control value. dec. = decrease; inc. = increase. N/A indicates no value could be assessed.

**Table S10.** Average AFG concentrations assessed for LA4 (SRRC 594) with each VOC treatment.

| Treatment <sup>1</sup> | Concentration (ppb) <sup>2</sup> | Percent Change <sup>3</sup> |
|------------------------|----------------------------------|-----------------------------|
| <b>AFG<sub>1</sub></b> |                                  |                             |
| Control                | 109084 (13413)                   | N/A                         |
| 3.D_5                  | 21443 (9560)                     | 80% dec.                    |
| 3.D_10                 | 20896 (8053)                     | 81% dec.                    |
| 3.D_20                 | 21374 (14456)                    | 80% dec.                    |
| 2.D_5                  | 29553 (23370)                    | 73% dec.                    |
| 2.D_10                 | 45493 (15913)                    | 58% dec.                    |
| 2.D_20                 | 42670 (9930)                     | 61% dec.                    |
| 2.3_5                  | 25401 (5894)                     | 77% dec.                    |
| 2.3_10                 | 31540 (4094)                     | 71% dec.                    |
| 2.3_20                 | 26730 (3302)                     | 76% dec.                    |
| 2.3.D_7.5              | 54533 (11268)                    | 50% dec.                    |
| 2.3.D_15               | 68752 (13435)                    | 37% dec.                    |
| 2.3.D_30               | 74120 (1479)                     | 32% dec.                    |
| <b>AFG<sub>2</sub></b> |                                  |                             |
| Control                | 2062 (316)                       | N/A                         |
| 3.D_5                  | 921 (330)                        | 55% dec.                    |
| 3.D_10                 | 951 (275)                        | 54% dec.                    |
| 3.D_20                 | 1001 (590)                       | 51% dec.                    |
| 2.D_5                  | 835 (358)                        | 60% dec.                    |
| 2.D_10                 | 1023 (449)                       | 50% dec.                    |
| 2.D_20                 | 996 (284)                        | 52% dec.                    |
| 2.3_5                  | 556 (94)                         | 73% dec.                    |
| 2.3_10                 | 824 (45)                         | 60% dec.                    |
| 2.3_20                 | 681 (63)                         | 67% dec.                    |
| 2.3.D_7.5              | 929 (231)                        | 55% dec.                    |
| 2.3.D_15               | 1022 (508)                       | 50% dec.                    |
| 2.3.D_30               | 1240 (259)                       | 40% dec.                    |

<sup>1</sup> VOC combinations (2 = 2,3-dihydrofuran, 3 = 3-octanone, D = decane) and total volumes for each treatment (in µl). Control = toxins detected when no VOC combinations were used. LA1-LA3 do not produce this toxin and have been left out of this table.

<sup>2</sup> Average mycotoxin concentrations (ppb) assessed for each VOC treatment. The number in parentheses is the standard deviation from the mean.

<sup>3</sup> Percent (%) change in mycotoxin production from the control value. dec. = decrease; inc. = increase. N/A indicates no value could be assessed.

**Table S11.** Results of two-way ANOVA and Tukey's test comparing LA1 control IDTs with each VOC combination treatment.

| <b>3.D ANOVA</b>       | <b>SS (Type III)<sup>a</sup></b> | <b>DF<sup>b</sup></b>                 | <b>MS<sup>c</sup></b>   | <b>F (DFn, DFd)<sup>d</sup></b> | <b>P value</b>          |
|------------------------|----------------------------------|---------------------------------------|-------------------------|---------------------------------|-------------------------|
| Replicate              | 276701622                        | 2                                     | 138350811               | F (2, 6) = 0.3014               | 0.7504                  |
| Treatment              | 1361236843                       | 3                                     | 453745614               | F (3, 6) = 0.9884               | 0.4591                  |
| <b>3.D Tukey's</b>     | <b>Mean Diff.<sup>e</sup></b>    | <b>95.00% CI of diff.<sup>f</sup></b> | <b>Below threshold?</b> | <b>Summary<sup>g</sup></b>      | <b>Adjusted P Value</b> |
| Control vs. 3.D_5      | 17448                            | -43111 to 78008                       | No                      | ns                              | 0.7568                  |
| Control vs. 3.D_10     | -9304                            | -69863 to 51255                       | No                      | ns                              | 0.9481                  |
| Control vs. 3.D_20     | 13351                            | -47208 to 73910                       | No                      | ns                              | 0.8681                  |
| 3.D_5 vs. 3.D_10       | -26752                           | -87312 to 33807                       | No                      | ns                              | 0.4776                  |
| 3.D_5 vs. 3.D_20       | -4097                            | -64657 to 56462                       | No                      | ns                              | 0.9950                  |
| 3.D_10 vs. 3.D_20      | 22655                            | -37904 to 83214                       | No                      | ns                              | 0.5976                  |
| <b>2.D ANOVA</b>       | <b>SS (Type III)<sup>a</sup></b> | <b>DF<sup>b</sup></b>                 | <b>MS<sup>c</sup></b>   | <b>F (DFn, DFd)<sup>d</sup></b> | <b>P value</b>          |
| Replicate              | 1014637646                       | 2                                     | 507318823               | F (2, 6) = 2.067                | 0.2076                  |
| Treatment              | 1240494025                       | 3                                     | 413498008               | F (3, 6) = 1.685                | 0.2684                  |
| <b>2.D Tukey's</b>     | <b>Mean Diff.<sup>e</sup></b>    | <b>95.00% CI of diff.<sup>f</sup></b> | <b>Below threshold?</b> | <b>Summary<sup>g</sup></b>      | <b>Adjusted P Value</b> |
| Control vs. 2.D_5      | 9328                             | -34954 to 53611                       | No                      | ns                              | 0.8821                  |
| Control vs. 2.D_10     | -17018                           | -61300 to 27265                       | No                      | ns                              | 0.5788                  |
| Control vs. 2.D_20     | -11249                           | -55532 to 33033                       | No                      | ns                              | 0.8157                  |
| 2.D_5 vs. 2.D_10       | -26346                           | -70628 to 17936                       | No                      | ns                              | 0.2659                  |
| 2.D_5 vs. 2.D_20       | -20578                           | -64860 to 23705                       | No                      | ns                              | 0.4401                  |
| 2.D_10 vs. 2.D_20      | 5768                             | -38514 to 50051                       | No                      | ns                              | 0.9670                  |
| <b>2.3 ANOVA</b>       | <b>SS (Type III)<sup>a</sup></b> | <b>DF<sup>b</sup></b>                 | <b>MS<sup>c</sup></b>   | <b>F (DFn, DFd)<sup>d</sup></b> | <b>P value</b>          |
| Replicate              | 60487448                         | 2                                     | 30243724                | F (2, 6) = 0.1849               | 0.8358                  |
| Treatment              | 324708270                        | 3                                     | 108236090               | F (3, 6) = 0.6616               | 0.6052                  |
| <b>2.3 Tukey's</b>     | <b>Mean Diff.<sup>e</sup></b>    | <b>95.00% CI of diff.<sup>f</sup></b> | <b>Below threshold?</b> | <b>Summary<sup>g</sup></b>      | <b>Adjusted P Value</b> |
| Control vs. 2.3_5      | -227.0                           | -36380 to 35926                       | No                      | ns                              | > 0.9999                |
| Control vs. 2.3_10     | 12399                            | -23754 to 48552                       | No                      | ns                              | 0.6556                  |
| Control vs. 2.3_20     | 1796                             | -34357 to 37949                       | No                      | ns                              | 0.9980                  |
| 2.3_5 vs. 2.3_10       | 12626                            | -23527 to 48779                       | No                      | ns                              | 0.6438                  |
| 2.3_5 vs. 2.3_20       | 2023                             | -34130 to 38176                       | No                      | ns                              | 0.9971                  |
| 2.3_10 vs. 2.3_20      | -10603                           | -46756 to 25550                       | No                      | ns                              | 0.7475                  |
| <b>2.3.D ANOVA</b>     | <b>SS (Type III)<sup>a</sup></b> | <b>DF<sup>b</sup></b>                 | <b>MS<sup>c</sup></b>   | <b>F (DFn, DFd)<sup>d</sup></b> | <b>P value</b>          |
| Replicate              | 55611637                         | 2                                     | 27805818                | F (2, 6) = 0.3937               | 0.6908                  |
| Treatment              | 2621011424                       | 3                                     | 873670475               | F (3, 6) = 12.37                | 0.0056                  |
| <b>2.3.D Tukey's</b>   | <b>Mean Diff.<sup>e</sup></b>    | <b>95.00% CI of diff.<sup>f</sup></b> | <b>Below threshold?</b> | <b>Summary<sup>g</sup></b>      | <b>Adjusted P Value</b> |
| Control vs. 2.3.D_7.5  | 38033                            | 14278 to 61788                        | Yes                     | **                              | 0.0059                  |
| Control vs. 2.3.D_15   | 16965                            | -6790 to 40720                        | No                      | ns                              | 0.1625                  |
| Control vs. 2.3.D_30   | 32361                            | 8606 to 56116                         | Yes                     | *                               | 0.0129                  |
| 2.3.D_7.5 vs. 2.3.D_15 | -21068                           | -44823 to 2687                        | No                      | ns                              | 0.0791                  |
| 2.3.D_7.5 vs. 2.3.D_30 | -5672                            | -29427 to 18083                       | No                      | ns                              | 0.8404                  |
| 2.3.D_15 vs. 2.3.D_30  | 15396                            | -8359 to 39151                        | No                      | ns                              | 0.2139                  |

<sup>a</sup> Partial (non-sequential) Sum of Squares <sup>b</sup> Degrees of Freedom <sup>c</sup> Mean Squares <sup>d</sup> F ratios based on Degrees of Freedom. n = numerator, d = denominator <sup>e</sup> Difference from the control mean. Negative values indicate enhanced growth and positive values indicate reduced growth. <sup>f</sup> Confidence interval (CI) of difference from control <sup>g</sup> Not significant (ns) > 0.05, \*  $P \leq 0.05$ , \*\*  $P \leq 0.01$ , \*\*\*  $P \leq 0.001$ , \*\*\*\*  $P \leq 0.0001$ .



**Table S12.** Results of two-way ANOVA and Tukey's test comparing LA2 control AFB<sub>1</sub> with each VOC combination treatment.

| <b>3.D ANOVA</b>       | <b>SS (Type III)<sup>a</sup></b> | <b>DF<sup>b</sup></b>                 | <b>MS<sup>c</sup></b>   | <b>F (DFn, DFd)<sup>d</sup></b> | <b>P value</b>          |
|------------------------|----------------------------------|---------------------------------------|-------------------------|---------------------------------|-------------------------|
| Replicate              | 42745825                         | 2                                     | 21372912                | F (2, 6) = 1.184                | 0.3686                  |
| Treatment              | 585001882                        | 3                                     | 195000627               | F (3, 6) = 10.80                | 0.0078                  |
| <b>3.D Tukey's</b>     | <b>Mean Diff.<sup>e</sup></b>    | <b>95.00% CI of diff.<sup>f</sup></b> | <b>Below threshold?</b> | <b>Summary<sup>g</sup></b>      | <b>Adjusted P Value</b> |
| Control vs. 3.D_5      | 17667                            | 5658 to 29676                         | Yes                     | **                              | 0.0089                  |
| Control vs. 3.D_10     | 16404                            | 4395 to 28414                         | Yes                     | *                               | 0.0127                  |
| Control vs. 3.D_20     | 12342                            | 332.8 to 24351                        | Yes                     | *                               | 0.0448                  |
| 3.D_5 vs. 3.D_10       | -1263                            | -13272 to 10747                       | No                      | ns                              | 0.9820                  |
| 3.D_5 vs. 3.D_20       | -5325                            | -17334 to 6684                        | No                      | ns                              | 0.4749                  |
| 3.D_10 vs. 3.D_20      | -4062                            | -16072 to 7947                        | No                      | ns                              | 0.6644                  |
| <b>2.D ANOVA</b>       | <b>SS (Type III)<sup>a</sup></b> | <b>DF<sup>b</sup></b>                 | <b>MS<sup>c</sup></b>   | <b>F (DFn, DFd)<sup>d</sup></b> | <b>P value</b>          |
| Replicate              | 37611802                         | 2                                     | 18805901                | F (2, 6) = 1.078                | 0.3981                  |
| Treatment              | 335499628                        | 3                                     | 111833209               | F (3, 6) = 6.412                | 0.0266                  |
| <b>2.D Tukey's</b>     | <b>Mean Diff.<sup>e</sup></b>    | <b>95.00% CI of diff.<sup>f</sup></b> | <b>Below threshold?</b> | <b>Summary<sup>g</sup></b>      | <b>Adjusted P Value</b> |
| Control vs. 2.D_5      | 12374                            | 569.8 to 24178                        | Yes                     | *                               | 0.0413                  |
| Control vs. 2.D_10     | 12624                            | 820.1 to 24429                        | Yes                     | *                               | 0.0380                  |
| Control vs. 2.D_20     | 11526                            | -277.9 to 23331                       | No                      | ns                              | 0.0549                  |
| 2.D_5 vs. 2.D_10       | 250.3                            | -11554 to 12055                       | No                      | ns                              | 0.9998                  |
| 2.D_5 vs. 2.D_20       | -847.7                           | -12652 to 10957                       | No                      | ns                              | 0.9940                  |
| 2.D_10 vs. 2.D_20      | -1098                            | -12902 to 10706                       | No                      | ns                              | 0.9873                  |
| <b>2.3 ANOVA</b>       | <b>SS (Type III)<sup>a</sup></b> | <b>DF<sup>b</sup></b>                 | <b>MS<sup>c</sup></b>   | <b>F (DFn, DFd)<sup>d</sup></b> | <b>P value</b>          |
| Replicate              | 42756382                         | 2                                     | 21378191                | F (2, 6) = 11.88                | 0.0082                  |
| Treatment              | 468904195                        | 3                                     | 156301398               | F (3, 6) = 86.87                | < 0.0001                |
| <b>2.3 Tukey's</b>     | <b>Mean Diff.<sup>e</sup></b>    | <b>95.00% CI of diff.<sup>f</sup></b> | <b>Below threshold?</b> | <b>Summary<sup>g</sup></b>      | <b>Adjusted P Value</b> |
| Control vs. 2.3_5      | 15942                            | 12151 to 19734                        | Yes                     | ****                            | < 0.0001                |
| Control vs. 2.3_10     | 11483                            | 7692 to 15274                         | Yes                     | ***                             | 0.0002                  |
| Control vs. 2.3_20     | 14433                            | 10642 to 18225                        | Yes                     | ****                            | < 0.0001                |
| 2.3_5 vs. 2.3_10       | -4459                            | -8251 to -668.0                       | Yes                     | *                               | 0.0253                  |
| 2.3_5 vs. 2.3_20       | -1509                            | -5300 to 2282                         | No                      | ns                              | 0.5539                  |
| 2.3_10 vs. 2.3_20      | 2950                             | -841.0 to 6742                        | No                      | ns                              | 0.1243                  |
| <b>2.3.D ANOVA</b>     | <b>SS (Type III)<sup>a</sup></b> | <b>DF<sup>b</sup></b>                 | <b>MS<sup>c</sup></b>   | <b>F (DFn, DFd)<sup>d</sup></b> | <b>P value</b>          |
| Replicate              | 112813105                        | 2                                     | 56406552                | F (2, 6) = 2.192                | 0.1929                  |
| Treatment              | 252564056                        | 3                                     | 84188019                | F (3, 6) = 3.272                | 0.1009                  |
| <b>2.3.D Tukey's</b>   | <b>Mean Diff.<sup>e</sup></b>    | <b>95.00% CI of diff.<sup>f</sup></b> | <b>Below threshold?</b> | <b>Summary<sup>g</sup></b>      | <b>Adjusted P Value</b> |
| Control vs. 2.3.D_7.5  | 9257                             | -5080 to 23595                        | No                      | ns                              | 0.2160                  |
| Control vs. 2.3.D_15   | 2747                             | -11590 to 17084                       | No                      | ns                              | 0.9071                  |
| Control vs. 2.3.D_30   | -3208                            | -17545 to 11130                       | No                      | ns                              | 0.8633                  |
| 2.3.D_7.5 vs. 2.3.D_15 | -6510                            | -20848 to 7827                        | No                      | ns                              | 0.4572                  |
| 2.3.D_7.5 vs. 2.3.D_30 | -12465                           | -26802 to 1872                        | No                      | ns                              | 0.0851                  |
| 2.3.D_15 vs. 2.3.D_30  | -5955                            | -20292 to 8383                        | No                      | ns                              | 0.5231                  |

<sup>a</sup> Partial (non-sequential) Sum of Squares <sup>b</sup> Degrees of Freedom <sup>c</sup> Mean Squares <sup>d</sup> F ratios based on Degrees of Freedom. n = numerator, d = denominator <sup>e</sup> Difference from the control mean. Negative values indicate enhanced growth and positive values indicate reduced growth. <sup>f</sup> Confidence interval (CI) of difference from control <sup>g</sup> Not significant (ns) > 0.05, \*  $P \leq 0.05$ , \*\*  $P \leq 0.01$ , \*\*\*  $P \leq 0.001$ , \*\*\*\*  $P \leq 0.0001$ .

**Table S13.** Results of two-way ANOVA and Tukey's test comparing LA2 control AFB<sub>2</sub> with each VOC combination treatment.

| <b>3.D ANOVA</b>       | <b>SS (Type III)<sup>a</sup></b> | <b>DF<sup>b</sup></b>                 | <b>MS<sup>c</sup></b>   | <b>F (DFn, DFd)<sup>d</sup></b> | <b>P value</b>          |
|------------------------|----------------------------------|---------------------------------------|-------------------------|---------------------------------|-------------------------|
| Replicate              | 3981                             | 2                                     | 1991                    | F (2, 6) = 1.068                | 0.4011                  |
| Treatment              | 23936                            | 3                                     | 7979                    | F (3, 6) = 4.280                | 0.0616                  |
| <b>3.D Tukey's</b>     | <b>Mean Diff.<sup>e</sup></b>    | <b>95.00% CI of diff.<sup>f</sup></b> | <b>Below threshold?</b> | <b>Summary<sup>g</sup></b>      | <b>Adjusted P Value</b> |
| Control vs. 3.D_5      | 120.0                            | -2.031 to 242.0                       | No                      | ns                              | 0.0534                  |
| Control vs. 3.D_10     | 93.67                            | -28.36 to 215.7                       | No                      | ns                              | 0.1300                  |
| Control vs. 3.D_20     | 65.67                            | -56.36 to 187.7                       | No                      | ns                              | 0.3334                  |
| 3.D_5 vs. 3.D_10       | -26.33                           | -148.4 to 95.70                       | No                      | ns                              | 0.8749                  |
| 3.D_5 vs. 3.D_20       | -54.33                           | -176.4 to 67.70                       | No                      | ns                              | 0.4718                  |
| 3.D_10 vs. 3.D_20      | -28.00                           | -150.0 to 94.03                       | No                      | ns                              | 0.8548                  |
| <b>2.D ANOVA</b>       | <b>SS (Type III)<sup>a</sup></b> | <b>DF<sup>b</sup></b>                 | <b>MS<sup>c</sup></b>   | <b>F (DFn, DFd)<sup>d</sup></b> | <b>P value</b>          |
| Replicate              | 8129                             | 2                                     | 4064                    | F (2, 6) = 1.768                | 0.2491                  |
| Treatment              | 3082                             | 3                                     | 1027                    | F (3, 6) = 0.4469               | 0.7285                  |
| <b>2.D Tukey's</b>     | <b>Mean Diff.<sup>e</sup></b>    | <b>95.00% CI of diff.<sup>f</sup></b> | <b>Below threshold?</b> | <b>Summary<sup>g</sup></b>      | <b>Adjusted P Value</b> |
| Control vs. 2.D_5      | 43.33                            | -92.18 to 178.8                       | No                      | ns                              | 0.6988                  |
| Control vs. 2.D_10     | 32.00                            | -103.5 to 167.5                       | No                      | ns                              | 0.8445                  |
| Control vs. 2.D_20     | 20.33                            | -115.2 to 155.8                       | No                      | ns                              | 0.9513                  |
| 2.D_5 vs. 2.D_10       | -11.33                           | -146.8 to 124.2                       | No                      | ns                              | 0.9907                  |
| 2.D_5 vs. 2.D_20       | -23.00                           | -158.5 to 112.5                       | No                      | ns                              | 0.9323                  |
| 2.D_10 vs. 2.D_20      | -11.67                           | -147.2 to 123.8                       | No                      | ns                              | 0.9899                  |
| <b>2.3 ANOVA</b>       | <b>SS (Type III)<sup>a</sup></b> | <b>DF<sup>b</sup></b>                 | <b>MS<sup>c</sup></b>   | <b>F (DFn, DFd)<sup>d</sup></b> | <b>P value</b>          |
| Replicate              | 3610                             | 2                                     | 1805                    | F (2, 6) = 6.223                | 0.0344                  |
| Treatment              | 23863                            | 3                                     | 7954                    | F (3, 6) = 27.42                | 0.0007                  |
| <b>2.3 Tukey's</b>     | <b>Mean Diff.<sup>e</sup></b>    | <b>95.00% CI of diff.<sup>f</sup></b> | <b>Below threshold?</b> | <b>Summary<sup>g</sup></b>      | <b>Adjusted P Value</b> |
| Control vs. 2.3_5      | 123.0                            | 74.86 to 171.1                        | Yes                     | ***                             | 0.0005                  |
| Control vs. 2.3_10     | 50.33                            | 2.193 to 98.47                        | Yes                     | *                               | 0.0417                  |
| Control vs. 2.3_20     | 78.00                            | 29.86 to 126.1                        | Yes                     | **                              | 0.0055                  |
| 2.3_5 vs. 2.3_10       | -72.67                           | -120.8 to -24.53                      | Yes                     | **                              | 0.0079                  |
| 2.3_5 vs. 2.3_20       | -45.00                           | -93.14 to 3.140                       | No                      | ns                              | 0.0650                  |
| 2.3_10 vs. 2.3_20      | 27.67                            | -20.47 to 75.81                       | No                      | ns                              | 0.2885                  |
| <b>2.3.D ANOVA</b>     | <b>SS (Type III)<sup>a</sup></b> | <b>DF<sup>b</sup></b>                 | <b>MS<sup>c</sup></b>   | <b>F (DFn, DFd)<sup>d</sup></b> | <b>P value</b>          |
| Replicate              | 9617                             | 2                                     | 4808                    | F (2, 6) = 3.103                | 0.1188                  |
| Treatment              | 5064                             | 3                                     | 1688                    | F (3, 6) = 1.089                | 0.4227                  |
| <b>2.3.D Tukey's</b>   | <b>Mean Diff.<sup>e</sup></b>    | <b>95.00% CI of diff.<sup>f</sup></b> | <b>Below threshold?</b> | <b>Summary<sup>g</sup></b>      | <b>Adjusted P Value</b> |
| Control vs. 2.3.D_7.5  | 9257                             | -5080 to 23595                        | No                      | ns                              | 0.2160                  |
| Control vs. 2.3.D_15   | 2747                             | -11590 to 17084                       | No                      | ns                              | 0.9071                  |
| Control vs. 2.3.D_30   | -3208                            | -17545 to 11130                       | No                      | ns                              | 0.8633                  |
| 2.3.D_7.5 vs. 2.3.D_15 | -6510                            | -20848 to 7827                        | No                      | ns                              | 0.4572                  |
| 2.3.D_7.5 vs. 2.3.D_30 | -12465                           | -26802 to 1872                        | No                      | ns                              | 0.0851                  |
| 2.3.D_15 vs. 2.3.D_30  | -5955                            | -20292 to 8383                        | No                      | ns                              | 0.5231                  |

<sup>a</sup> Partial (non-sequential) Sum of Squares <sup>b</sup> Degrees of Freedom <sup>c</sup> Mean Squares. <sup>d</sup> F ratios based on Degrees of Freedom. n = numerator, d = denominator <sup>e</sup> Difference from the control mean. Negative values indicate enhanced growth and positive values indicate reduced growth. <sup>f</sup> Confidence interval (CI) of difference from control <sup>g</sup> Not significant (ns) > 0.05, \*  $P \leq 0.05$ , \*\*  $P \leq 0.01$ , \*\*\*  $P \leq 0.001$ , \*\*\*\*  $P \leq 0.0001$

**Table S14.** Results of two-way ANOVA and Tukey's test comparing LA2 control CPA with each VOC combination treatment.

| <b>3.D ANOVA</b>       | <b>SS (Type III)<sup>a</sup></b> | <b>DF<sup>b</sup></b>                 | <b>MS<sup>c</sup></b>   | <b>F (DFn, DFd)<sup>d</sup></b> | <b>P value</b>          |
|------------------------|----------------------------------|---------------------------------------|-------------------------|---------------------------------|-------------------------|
| Replicate              | 77404                            | 2                                     | 38702                   | F (2, 6) = 2.872                | 0.1334                  |
| Treatment              | 1575865                          | 3                                     | 525288                  | F (3, 6) = 38.98                | 0.0002                  |
| <b>3.D Tukey's</b>     | <b>Mean Diff.<sup>e</sup></b>    | <b>95.00% CI of diff.<sup>f</sup></b> | <b>Below threshold?</b> | <b>Summary<sup>g</sup></b>      | <b>Adjusted P Value</b> |
| Control vs. 3.D_5      | 886.7                            | 558.5 to 1215                         | Yes                     | ***                             | 0.0004                  |
| Control vs. 3.D_10     | 856.3                            | 528.2 to 1184                         | Yes                     | ***                             | 0.0004                  |
| Control vs. 3.D_20     | 738.0                            | 409.9 to 1066                         | Yes                     | ***                             | 0.0010                  |
| 3.D_5 vs. 3.D_10       | -30.33                           | -358.5 to 297.8                       | No                      | ns                              | 0.9876                  |
| 3.D_5 vs. 3.D_20       | -148.7                           | -476.8 to 179.5                       | No                      | ns                              | 0.4588                  |
| 3.D_10 vs. 3.D_20      | -118.3                           | -446.5 to 209.8                       | No                      | ns                              | 0.6226                  |
| <b>2.D ANOVA</b>       | <b>SS (Type III)<sup>a</sup></b> | <b>DF<sup>b</sup></b>                 | <b>MS<sup>c</sup></b>   | <b>F (DFn, DFd)<sup>d</sup></b> | <b>P value</b>          |
| Replicate              | 72892                            | 2                                     | 36446                   | F (2, 6) = 1.311                | 0.3371                  |
| Treatment              | 1066872                          | 3                                     | 355624                  | F (3, 6) = 12.79                | 0.0051                  |
| <b>2.D Tukey's</b>     | <b>Mean Diff.<sup>e</sup></b>    | <b>95.00% CI of diff.<sup>f</sup></b> | <b>Below threshold?</b> | <b>Summary<sup>g</sup></b>      | <b>Adjusted P Value</b> |
| Control vs. 2.D_5      | 638.0                            | 166.7 to 1109                         | Yes                     | *                               | 0.0133                  |
| Control vs. 2.D_10     | 708.0                            | 236.7 to 1179                         | Yes                     | **                              | 0.0080                  |
| Control vs. 2.D_20     | 710.0                            | 238.7 to 1181                         | Yes                     | **                              | 0.0079                  |
| 2.D_5 vs. 2.D_10       | 70.00                            | -401.3 to 541.3                       | No                      | ns                              | 0.9527                  |
| 2.D_5 vs. 2.D_20       | 72.00                            | -399.3 to 543.3                       | No                      | ns                              | 0.9489                  |
| 2.D_10 vs. 2.D_20      | 2.000                            | -469.3 to 473.3                       | No                      | ns                              | > 0.9999                |
| <b>2.3 ANOVA</b>       | <b>SS (Type III)<sup>a</sup></b> | <b>DF<sup>b</sup></b>                 | <b>MS<sup>c</sup></b>   | <b>F (DFn, DFd)<sup>d</sup></b> | <b>P value</b>          |
| Replicate              | 35108                            | 2                                     | 17554                   | F (2, 6) = 2.762                | 0.1411                  |
| Treatment              | 2701427                          | 3                                     | 900476                  | F (3, 6) = 141.7                | < 0.0001                |
| <b>2.3 Tukey's</b>     | <b>Mean Diff.<sup>e</sup></b>    | <b>95.00% CI of diff.<sup>f</sup></b> | <b>Below threshold?</b> | <b>Summary<sup>g</sup></b>      | <b>Adjusted P Value</b> |
| Control vs. 2.3_5      | 1055                             | 830.0 to 1281                         | Yes                     | ****                            | < 0.0001                |
| Control vs. 2.3_10     | 1111                             | 885.3 to 1336                         | Yes                     | ****                            | < 0.0001                |
| Control vs. 2.3_20     | 1117                             | 891.7 to 1342                         | Yes                     | ****                            | < 0.0001                |
| 2.3_5 vs. 2.3_10       | 55.33                            | -170.0 to 280.7                       | No                      | ns                              | 0.8295                  |
| 2.3_5 vs. 2.3_20       | 61.67                            | -163.7 to 287.0                       | No                      | ns                              | 0.7823                  |
| 2.3_10 vs. 2.3_20      | 6.333                            | -219.0 to 231.7                       | No                      | ns                              | 0.9996                  |
| <b>2.3.D ANOVA</b>     | <b>SS (Type III)<sup>a</sup></b> | <b>DF<sup>b</sup></b>                 | <b>MS<sup>c</sup></b>   | <b>F (DFn, DFd)<sup>d</sup></b> | <b>P value</b>          |
| Replicate              | 276460                           | 2                                     | 138230                  | F (2, 6) = 1.331                | 0.3324                  |
| Treatment              | 446490                           | 3                                     | 148830                  | F (3, 6) = 1.433                | 0.3231                  |
| <b>2.3.D Tukey's</b>   | <b>Mean Diff.<sup>e</sup></b>    | <b>95.00% CI of diff.<sup>f</sup></b> | <b>Below threshold?</b> | <b>Summary<sup>g</sup></b>      | <b>Adjusted P Value</b> |
| Control vs. 2.3.D_7.5  | 374.0                            | -537.0 to 1285                        | No                      | ns                              | 0.5315                  |
| Control vs. 2.3.D_15   | 251.0                            | -660.0 to 1162                        | No                      | ns                              | 0.7790                  |
| Control vs. 2.3.D_30   | 527.0                            | -384.0 to 1438                        | No                      | ns                              | 0.2841                  |
| 2.3.D_7.5 vs. 2.3.D_15 | -123.0                           | -1034 to 788.0                        | No                      | ns                              | 0.9636                  |
| 2.3.D_7.5 vs. 2.3.D_30 | 153.0                            | -758.0 to 1064                        | No                      | ns                              | 0.9341                  |
| 2.3.D_15 vs. 2.3.D_30  | 276.0                            | -635.0 to 1187                        | No                      | ns                              | 0.7298                  |

<sup>a</sup> Partial (non-sequential) Sum of Squares <sup>b</sup> Degrees of Freedom <sup>c</sup> Mean Squares <sup>d</sup> F ratios based on Degrees of Freedom. n = numerator, d = denominator <sup>e</sup> Difference from the control mean. Negative values indicate enhanced growth and positive values indicate reduced growth. <sup>f</sup> Confidence interval (CI) of difference from control <sup>g</sup> Not significant (ns) > 0.05, \*  $P \leq 0.05$ , \*\*  $P \leq 0.01$ , \*\*\*  $P \leq 0.001$ , \*\*\*\*  $P \leq 0.0001$ .

**Table S15.** Results of two-way ANOVA and Tukey's test comparing LA2 control IDTs with each VOC combination treatment.

| <b>3.D ANOVA</b>       | <b>SS (Type III)<sup>a</sup></b> | <b>DF<sup>b</sup></b>                 | <b>MS<sup>c</sup></b>   | <b>F (DFn, DFd)<sup>d</sup></b> | <b>P value</b>          |
|------------------------|----------------------------------|---------------------------------------|-------------------------|---------------------------------|-------------------------|
| Replicate              | 76605                            | 2                                     | 38303                   | F (2, 6) = 1.020                | 0.4157                  |
| Treatment              | 79319                            | 3                                     | 26440                   | F (3, 6) = 0.7038               | 0.5836                  |
| <b>3.D Tukey's</b>     | <b>Mean Diff.<sup>e</sup></b>    | <b>95.00% CI of diff.<sup>f</sup></b> | <b>Below threshold?</b> | <b>Summary<sup>g</sup></b>      | <b>Adjusted P Value</b> |
| Control vs. 3.D_5      | 47.67                            | -500.1 to 595.5                       | No                      | ns                              | 0.9896                  |
| Control vs. 3.D_10     | -142.3                           | -690.1 to 405.5                       | No                      | ns                              | 0.8061                  |
| Control vs. 3.D_20     | 64.33                            | -483.5 to 612.1                       | No                      | ns                              | 0.9753                  |
| 3.D_5 vs. 3.D_10       | -190.0                           | -737.8 to 357.8                       | No                      | ns                              | 0.6483                  |
| 3.D_5 vs. 3.D_20       | 16.67                            | -531.1 to 564.5                       | No                      | ns                              | 0.9995                  |
| 3.D_10 vs. 3.D_20      | 206.7                            | -341.1 to 754.5                       | No                      | ns                              | 0.5918                  |
| <b>2.D ANOVA</b>       | <b>SS (Type III)<sup>a</sup></b> | <b>DF<sup>b</sup></b>                 | <b>MS<sup>c</sup></b>   | <b>F (DFn, DFd)<sup>d</sup></b> | <b>P value</b>          |
| Replicate              | 151530                           | 2                                     | 75765                   | F (2, 6) = 2.258                | 0.1857                  |
| Treatment              | 57095                            | 3                                     | 19032                   | F (3, 6) = 0.5673               | 0.6566                  |
| <b>2.D Tukey's</b>     | <b>Mean Diff.<sup>e</sup></b>    | <b>95.00% CI of diff.<sup>f</sup></b> | <b>Below threshold?</b> | <b>Summary<sup>g</sup></b>      | <b>Adjusted P Value</b> |
| Control vs. 2.D_5      | -164.3                           | -682.0 to 353.4                       | No                      | ns                              | 0.7032                  |
| Control vs. 2.D_10     | -50.33                           | -568.0 to 467.4                       | No                      | ns                              | 0.9856                  |
| Control vs. 2.D_20     | -152.0                           | -669.7 to 365.7                       | No                      | ns                              | 0.7469                  |
| 2.D_5 vs. 2.D_10       | 114.0                            | -403.7 to 631.7                       | No                      | ns                              | 0.8685                  |
| 2.D_5 vs. 2.D_20       | 12.33                            | -505.4 to 530.0                       | No                      | ns                              | 0.9998                  |
| 2.D_10 vs. 2.D_20      | -101.7                           | -619.4 to 416.0                       | No                      | ns                              | 0.9011                  |
| <b>2.3 ANOVA</b>       | <b>SS (Type III)<sup>a</sup></b> | <b>DF<sup>b</sup></b>                 | <b>MS<sup>c</sup></b>   | <b>F (DFn, DFd)<sup>d</sup></b> | <b>P value</b>          |
| Replicate              | 331742                           | 2                                     | 165871                  | F (2, 6) = 0.5763               | 0.5903                  |
| Treatment              | 414930                           | 3                                     | 138310                  | F (3, 6) = 0.4805               | 0.7077                  |
| <b>2.3 Tukey's</b>     | <b>Mean Diff.<sup>e</sup></b>    | <b>95.00% CI of diff.<sup>f</sup></b> | <b>Below threshold?</b> | <b>Summary<sup>g</sup></b>      | <b>Adjusted P Value</b> |
| Control vs. 2.3_5      | -350.3                           | -1867 to 1166                         | No                      | ns                              | 0.8524                  |
| Control vs. 2.3_10     | -207.0                           | -1723 to 1309                         | No                      | ns                              | 0.9625                  |
| Control vs. 2.3_20     | -504.7                           | -2021 to 1012                         | No                      | ns                              | 0.6746                  |
| 2.3_5 vs. 2.3_10       | 143.3                            | -1373 to 1660                         | No                      | ns                              | 0.9867                  |
| 2.3_5 vs. 2.3_20       | -154.3                           | -1671 to 1362                         | No                      | ns                              | 0.9836                  |
| 2.3_10 vs. 2.3_20      | -297.7                           | -1814 to 1219                         | No                      | ns                              | 0.9012                  |
| <b>2.3.D ANOVA</b>     | <b>SS (Type III)<sup>a</sup></b> | <b>DF<sup>b</sup></b>                 | <b>MS<sup>c</sup></b>   | <b>F (DFn, DFd)<sup>d</sup></b> | <b>P value</b>          |
| Replicate              | 75446                            | 2                                     | 37723                   | F (2, 6) = 13.12                | 0.0065                  |
| Treatment              | 20657                            | 3                                     | 6886                    | F (3, 6) = 2.394                | 0.1670                  |
| <b>2.3.D Tukey's</b>   | <b>Mean Diff.<sup>e</sup></b>    | <b>95.00% CI of diff.<sup>f</sup></b> | <b>Below threshold?</b> | <b>Summary<sup>g</sup></b>      | <b>Adjusted P Value</b> |
| Control vs. 2.3.D_7.5  | 38.00                            | -113.6 to 189.6                       | No                      | ns                              | 0.8212                  |
| Control vs. 2.3.D_15   | 36.67                            | -114.9 to 188.2                       | No                      | ns                              | 0.8354                  |
| Control vs. 2.3.D_30   | 114.0                            | -37.58 to 265.6                       | No                      | ns                              | 0.1387                  |
| 2.3.D_7.5 vs. 2.3.D_15 | -1.333                           | -152.9 to 150.2                       | No                      | ns                              | > 0.9999                |
| 2.3.D_7.5 vs. 2.3.D_30 | 76.00                            | -75.58 to 227.6                       | No                      | ns                              | 0.3841                  |
| 2.3.D_15 vs. 2.3.D_30  | 77.33                            | -74.25 to 228.9                       | No                      | ns                              | 0.3715                  |

<sup>a</sup> Partial (non-sequential) Sum of Squares <sup>b</sup> Degrees of Freedom <sup>c</sup> Mean Squares <sup>d</sup> F ratios based on Degrees of Freedom. n = numerator, d = denominator <sup>e</sup> Difference from the control mean. Negative values indicate enhanced growth and positive values indicate reduced growth. <sup>f</sup> Confidence interval (CI) of difference from control <sup>g</sup> Not significant (ns) > 0.05, \*  $P \leq 0.05$ , \*\*  $P \leq 0.01$ , \*\*\*  $P \leq 0.001$ , \*\*\*\*  $P \leq 0.0001$ .

**Table S16.** Results of two-way ANOVA and Tukey's test comparing LA3 control AFB<sub>1</sub> with each VOC combination treatment.

| <b>3.D ANOVA</b>       | <b>SS (Type III)<sup>a</sup></b> | <b>DF<sup>b</sup></b>                 | <b>MS<sup>c</sup></b>   | <b>F (DFn, DFd)<sup>d</sup></b> | <b>P value</b>          |
|------------------------|----------------------------------|---------------------------------------|-------------------------|---------------------------------|-------------------------|
| Replicate              | 475549536                        | 2                                     | 237774768               | F (2, 6) = 1.668                | 0.2654                  |
| Treatment              | 1038355569                       | 3                                     | 346118523               | F (3, 6) = 2.429                | 0.1635                  |
| <b>3.D Tukey's</b>     | <b>Mean Diff.<sup>e</sup></b>    | <b>95.00% CI of diff.<sup>f</sup></b> | <b>Below threshold?</b> | <b>Summary<sup>g</sup></b>      | <b>Adjusted P Value</b> |
| Control vs. 3.D_5      | 12376                            | -21367 to 46119                       | No                      | ns                              | 0.6112                  |
| Control vs. 3.D_10     | 1365                             | -32378 to 35108                       | No                      | ns                              | 0.9989                  |
| Control vs. 3.D_20     | 22984                            | -10759 to 56727                       | No                      | ns                              | 0.1865                  |
| 3.D_5 vs. 3.D_10       | -11011                           | -44754 to 22732                       | No                      | ns                              | 0.6867                  |
| 3.D_5 vs. 3.D_20       | 10609                            | -23134 to 44352                       | No                      | ns                              | 0.7088                  |
| 3.D_10 vs. 3.D_20      | 21619                            | -12124 to 55362                       | No                      | ns                              | 0.2205                  |
| <b>2.D ANOVA</b>       | <b>SS (Type III)<sup>a</sup></b> | <b>DF<sup>b</sup></b>                 | <b>MS<sup>c</sup></b>   | <b>F (DFn, DFd)<sup>d</sup></b> | <b>P value</b>          |
| Replicate              | 486247842                        | 2                                     | 243123921               | F (2, 6) = 3.557                | 0.0958                  |
| Treatment              | 1358614690                       | 3                                     | 452871563               | F (3, 6) = 6.626                | 0.0248                  |
| <b>2.D Tukey's</b>     | <b>Mean Diff.<sup>e</sup></b>    | <b>95.00% CI of diff.<sup>f</sup></b> | <b>Below threshold?</b> | <b>Summary<sup>g</sup></b>      | <b>Adjusted P Value</b> |
| Control vs. 2.D_5      | 18848                            | -4518 to 42215                        | No                      | ns                              | 0.1104                  |
| Control vs. 2.D_10     | 6061                             | -17306 to 29427                       | No                      | ns                              | 0.8068                  |
| Control vs. 2.D_20     | 27196                            | 3829 to 50562                         | Yes                     | *                               | 0.0265                  |
| 2.D_5 vs. 2.D_10       | -12788                           | -36154 to 10579                       | No                      | ns                              | 0.3217                  |
| 2.D_5 vs. 2.D_20       | 8347                             | -15019 to 31714                       | No                      | ns                              | 0.6289                  |
| 2.D_10 vs. 2.D_20      | 21135                            | -2232 to 44502                        | No                      | ns                              | 0.0736                  |
| <b>2.3 ANOVA</b>       | <b>SS (Type III)<sup>a</sup></b> | <b>DF<sup>b</sup></b>                 | <b>MS<sup>c</sup></b>   | <b>F (DFn, DFd)<sup>d</sup></b> | <b>P value</b>          |
| Replicate              | 42346407                         | 2                                     | 21173204                | F (2, 6) = 0.7489               | 0.5125                  |
| Treatment              | 4306249543                       | 3                                     | 1435416514              | F (3, 6) = 50.77                | 0.0001                  |
| <b>2.3 Tukey's</b>     | <b>Mean Diff.<sup>e</sup></b>    | <b>95.00% CI of diff.<sup>f</sup></b> | <b>Below threshold?</b> | <b>Summary<sup>g</sup></b>      | <b>Adjusted P Value</b> |
| Control vs. 2.3_5      | 39638                            | 24609 to 54667                        | Yes                     | ***                             | 0.0004                  |
| Control vs. 2.3_10     | 48400                            | 33371 to 63429                        | Yes                     | ***                             | 0.0001                  |
| Control vs. 2.3_20     | 17501                            | 2472 to 32530                         | Yes                     | *                               | 0.0264                  |
| 2.3_5 vs. 2.3_10       | 8762                             | -6267 to 23791                        | No                      | ns                              | 0.2790                  |
| 2.3_5 vs. 2.3_20       | -22137                           | -37166 to -7108                       | Yes                     | **                              | 0.0089                  |
| 2.3_10 vs. 2.3_20      | -30900                           | -45929 to -15871                      | Yes                     | **                              | 0.0016                  |
| <b>2.3.D ANOVA</b>     | <b>SS (Type III)<sup>a</sup></b> | <b>DF<sup>b</sup></b>                 | <b>MS<sup>c</sup></b>   | <b>F (DFn, DFd)<sup>d</sup></b> | <b>P value</b>          |
| Replicate              | 45494100                         | 2                                     | 22747050                | F (2, 6) = 1.660                | 0.2668                  |
| Treatment              | 1765927821                       | 3                                     | 588642607               | F (3, 6) = 42.96                | 0.0002                  |
| <b>2.3.D Tukey's</b>   | <b>Mean Diff.<sup>e</sup></b>    | <b>95.00% CI of diff.<sup>f</sup></b> | <b>Below threshold?</b> | <b>Summary<sup>g</sup></b>      | <b>Adjusted P Value</b> |
| Control vs. 2.3.D_7.5  | 29902                            | 19439 to 40365                        | Yes                     | ***                             | 0.0003                  |
| Control vs. 2.3.D_15   | 29521                            | 19058 to 39983                        | Yes                     | ***                             | 0.0003                  |
| Control vs. 2.3.D_30   | 19522                            | 9060 to 29985                         | Yes                     | **                              | 0.0027                  |
| 2.3.D_7.5 vs. 2.3.D_15 | -381.3                           | -10844 to 10081                       | No                      | ns                              | 0.9992                  |
| 2.3.D_7.5 vs. 2.3.D_30 | -10380                           | -20842 to 83.11                       | No                      | ns                              | 0.0516                  |
| 2.3.D_15 vs. 2.3.D_30  | -9998                            | -20461 to 464.4                       | No                      | ns                              | 0.0598                  |

<sup>a</sup> Partial (non-sequential) Sum of Squares <sup>b</sup> Degrees of Freedom <sup>c</sup> Mean Squares <sup>d</sup> F ratios based on Degrees of Freedom. n = numerator, d = denominator <sup>e</sup> Difference from the control mean. Negative values indicate enhanced growth and positive values indicate reduced growth. <sup>f</sup> Confidence interval (CI) of difference from control <sup>g</sup> Not significant (ns) > 0.05, \*  $P \leq 0.05$ , \*\*  $P \leq 0.01$ , \*\*\*  $P \leq 0.001$ , \*\*\*\*  $P \leq 0.0001$ .

**Table S17.** Results of two-way ANOVA and Tukey's test comparing LA3 control AFB<sub>2</sub> with each VOC combination treatment.

| <b>3.D ANOVA</b>       | <b>SS (Type III)<sup>a</sup></b> | <b>DF<sup>b</sup></b>                 | <b>MS<sup>c</sup></b>   | <b>F (DFn, DFd)<sup>d</sup></b> | <b>P value</b>          |
|------------------------|----------------------------------|---------------------------------------|-------------------------|---------------------------------|-------------------------|
| Replicate              | 581826                           | 2                                     | 290913                  | F (2, 6) = 2.473                | 0.1647                  |
| Treatment              | 409061                           | 3                                     | 136354                  | F (3, 6) = 1.159                | 0.3997                  |
| <b>3.D Tukey's</b>     | <b>Mean Diff.<sup>e</sup></b>    | <b>95.00% CI of diff.<sup>f</sup></b> | <b>Below threshold?</b> | <b>Summary<sup>g</sup></b>      | <b>Adjusted P Value</b> |
| Control vs. 3.D_5      | -60.33                           | -1030 to 909.2                        | No                      | ns                              | 0.9961                  |
| Control vs. 3.D_10     | -363.0                           | -1332 to 606.5                        | No                      | ns                              | 0.5970                  |
| Control vs. 3.D_20     | 143.3                            | -826.2 to 1113                        | No                      | ns                              | 0.9533                  |
| 3.D_5 vs. 3.D_10       | -302.7                           | -1272 to 666.8                        | No                      | ns                              | 0.7129                  |
| 3.D_5 vs. 3.D_20       | 203.7                            | -765.8 to 1173                        | No                      | ns                              | 0.8829                  |
| 3.D_10 vs. 3.D_20      | 506.3                            | -463.2 to 1476                        | No                      | ns                              | 0.3546                  |
| <b>2.D ANOVA</b>       | <b>SS (Type III)<sup>a</sup></b> | <b>DF<sup>b</sup></b>                 | <b>MS<sup>c</sup></b>   | <b>F (DFn, DFd)<sup>d</sup></b> | <b>P value</b>          |
| Replicate              | 204261                           | 2                                     | 102131                  | F (2, 6) = 3.282                | 0.1089                  |
| Treatment              | 179733                           | 3                                     | 59911                   | F (3, 6) = 1.925                | 0.2267                  |
| <b>2.D Tukey's</b>     | <b>Mean Diff.<sup>e</sup></b>    | <b>95.00% CI of diff.<sup>f</sup></b> | <b>Below threshold?</b> | <b>Summary<sup>g</sup></b>      | <b>Adjusted P Value</b> |
| Control vs. 2.D_5      | 41.33                            | -457.3 to 539.9                       | No                      | ns                              | 0.9909                  |
| Control vs. 2.D_10     | -153.0                           | -651.6 to 345.6                       | No                      | ns                              | 0.7227                  |
| Control vs. 2.D_20     | 190.7                            | -307.9 to 689.3                       | No                      | ns                              | 0.5823                  |
| 2.D_5 vs. 2.D_10       | -194.3                           | -692.9 to 304.3                       | No                      | ns                              | 0.5689                  |
| 2.D_5 vs. 2.D_20       | 149.3                            | -349.3 to 647.9                       | No                      | ns                              | 0.7362                  |
| 2.D_10 vs. 2.D_20      | 343.7                            | -154.9 to 842.3                       | No                      | ns                              | 0.1803                  |
| <b>2.3 ANOVA</b>       | <b>SS (Type III)<sup>a</sup></b> | <b>DF<sup>b</sup></b>                 | <b>MS<sup>c</sup></b>   | <b>F (DFn, DFd)<sup>d</sup></b> | <b>P value</b>          |
| Replicate              | 26152                            | 2                                     | 13076                   | F (2, 6) = 2.305                | 0.1809                  |
| Treatment              | 469623                           | 3                                     | 156541                  | F (3, 6) = 27.59                | 0.0007                  |
| <b>2.3 Tukey's</b>     | <b>Mean Diff.<sup>e</sup></b>    | <b>95.00% CI of diff.<sup>f</sup></b> | <b>Below threshold?</b> | <b>Summary<sup>g</sup></b>      | <b>Adjusted P Value</b> |
| Control vs. 2.3_5      | 370.3                            | 157.4 to 583.2                        | Yes                     | **                              | 0.0038                  |
| Control vs. 2.3_10     | 195.7                            | -17.23 to 408.6                       | No                      | ns                              | 0.0694                  |
| Control vs. 2.3_20     | -153.7                           | -366.6 to 59.23                       | No                      | ns                              | 0.1574                  |
| 2.3_5 vs. 2.3_10       | -174.7                           | -387.6 to 38.23                       | No                      | ns                              | 0.1042                  |
| 2.3_5 vs. 2.3_20       | -524.0                           | -736.9 to -311.1                      | Yes                     | ***                             | 0.0006                  |
| 2.3_10 vs. 2.3_20      | -349.3                           | -562.2 to -136.4                      | Yes                     | **                              | 0.0052                  |
| <b>2.3.D ANOVA</b>     | <b>SS (Type III)<sup>a</sup></b> | <b>DF<sup>b</sup></b>                 | <b>MS<sup>c</sup></b>   | <b>F (DFn, DFd)<sup>d</sup></b> | <b>P value</b>          |
| Replicate              | 4578                             | 2                                     | 2289                    | F (2, 6) = 0.7226               | 0.5234                  |
| Treatment              | 193296                           | 3                                     | 64432                   | F (3, 6) = 20.34                | 0.0015                  |
| <b>2.3.D Tukey's</b>   | <b>Mean Diff.<sup>e</sup></b>    | <b>95.00% CI of diff.<sup>f</sup></b> | <b>Below threshold?</b> | <b>Summary<sup>g</sup></b>      | <b>Adjusted P Value</b> |
| Control vs. 2.3.D_7.5  | 309.7                            | 150.6 to 468.7                        | Yes                     | **                              | 0.0021                  |
| Control vs. 2.3.D_15   | 309.0                            | 149.9 to 468.1                        | Yes                     | **                              | 0.0022                  |
| Control vs. 2.3.D_30   | 177.0                            | 17.92 to 336.1                        | Yes                     | *                               | 0.0322                  |
| 2.3.D_7.5 vs. 2.3.D_15 | -0.6667                          | -159.7 to 158.4                       | No                      | ns                              | > 0.9999                |
| 2.3.D_7.5 vs. 2.3.D_30 | -132.7                           | -291.7 to 26.41                       | No                      | ns                              | 0.0985                  |
| 2.3.D_15 vs. 2.3.D_30  | -132.0                           | -291.1 to 27.08                       | No                      | ns                              | 0.1002                  |

<sup>a</sup> Partial (non-sequential) Sum of Squares <sup>b</sup> Degrees of Freedom <sup>c</sup> Mean Squares <sup>d</sup> F ratios based on Degrees of Freedom. n = numerator, d = denominator <sup>e</sup> Difference from the control mean. Negative values indicate enhanced growth and positive values indicate reduced growth. <sup>f</sup> Confidence interval (CI) of difference from control <sup>g</sup> Not significant (ns) > 0.05, \*  $P \leq 0.05$ , \*\*  $P \leq 0.01$ , \*\*\*  $P \leq 0.001$ , \*\*\*\*  $P \leq 0.0001$ .

**Table S18.** Results of two-way ANOVA and Tukey's test comparing LA3 control CPA with each VOC combination treatment.

| <b>3.D ANOVA</b>       | <b>SS (Type III)<sup>a</sup></b> | <b>DF<sup>b</sup></b>                 | <b>MS<sup>c</sup></b>   | <b>F (DFn, DFd)<sup>d</sup></b> | <b>P value</b>          |
|------------------------|----------------------------------|---------------------------------------|-------------------------|---------------------------------|-------------------------|
| Replicate              | 909573                           | 2                                     | 454786                  | F (2, 6) = 0.9924               | 0.4243                  |
| Treatment              | 512795459                        | 3                                     | 170931820               | F (3, 6) = 373.0                | < 0.0001                |
| <b>3.D Tukey's</b>     | <b>Mean Diff.<sup>e</sup></b>    | <b>95.00% CI of diff.<sup>f</sup></b> | <b>Below threshold?</b> | <b>Summary<sup>g</sup></b>      | <b>Adjusted P Value</b> |
| Control vs. 3.D_5      | 15213                            | 13299 to 17126                        | Yes                     | ****                            | < 0.0001                |
| Control vs. 3.D_10     | 15409                            | 13496 to 17323                        | Yes                     | ****                            | < 0.0001                |
| Control vs. 3.D_20     | 14624                            | 12710 to 16537                        | Yes                     | ****                            | < 0.0001                |
| 3.D_5 vs. 3.D_10       | 196.7                            | -1717 to 2110                         | No                      | ns                              | 0.9831                  |
| 3.D_5 vs. 3.D_20       | -589.0                           | -2502 to 1324                         | No                      | ns                              | 0.7209                  |
| 3.D_10 vs. 3.D_20      | -785.7                           | -2699 to 1128                         | No                      | ns                              | 0.5314                  |
| <b>2.D ANOVA</b>       | <b>SS (Type III)<sup>a</sup></b> | <b>DF<sup>b</sup></b>                 | <b>MS<sup>c</sup></b>   | <b>F (DFn, DFd)<sup>d</sup></b> | <b>P value</b>          |
| Replicate              | 37566115                         | 2                                     | 18783058                | F (2, 6) = 3.311                | 0.1074                  |
| Treatment              | 223581300                        | 3                                     | 74527100                | F (3, 6) = 13.14                | 0.0048                  |
| <b>2.D Tukey's</b>     | <b>Mean Diff.<sup>e</sup></b>    | <b>95.00% CI of diff.<sup>f</sup></b> | <b>Below threshold?</b> | <b>Summary<sup>g</sup></b>      | <b>Adjusted P Value</b> |
| Control vs. 2.D_5      | 11165                            | 4433 to 17897                         | Yes                     | **                              | 0.0049                  |
| Control vs. 2.D_10     | 7682                             | 949.7 to 14414                        | Yes                     | *                               | 0.0288                  |
| Control vs. 2.D_20     | 9797                             | 3065 to 16529                         | Yes                     | **                              | 0.0094                  |
| 2.D_5 vs. 2.D_10       | -3483                            | -10215 to 3249                        | No                      | ns                              | 0.3613                  |
| 2.D_5 vs. 2.D_20       | -1368                            | -8100 to 5364                         | No                      | ns                              | 0.8922                  |
| 2.D_10 vs. 2.D_20      | 2115                             | -4617 to 8847                         | No                      | ns                              | 0.7092                  |
| <b>2.3 ANOVA</b>       | <b>SS (Type III)<sup>a</sup></b> | <b>DF<sup>b</sup></b>                 | <b>MS<sup>c</sup></b>   | <b>F (DFn, DFd)<sup>d</sup></b> | <b>P value</b>          |
| Replicate              | 238222                           | 2                                     | 119111                  | F (2, 6) = 5.370                | 0.0460                  |
| Treatment              | 491798838                        | 3                                     | 163932946               | F (3, 6) = 7391                 | < 0.0001                |
| <b>2.3 Tukey's</b>     | <b>Mean Diff.<sup>e</sup></b>    | <b>95.00% CI of diff.<sup>f</sup></b> | <b>Below threshold?</b> | <b>Summary<sup>g</sup></b>      | <b>Adjusted P Value</b> |
| Control vs. 2.3_5      | 14611                            | 14190 to 15032                        | Yes                     | ****                            | < 0.0001                |
| Control vs. 2.3_10     | 14526                            | 14105 to 14947                        | Yes                     | ****                            | < 0.0001                |
| Control vs. 2.3_20     | 15182                            | 14761 to 15603                        | Yes                     | ****                            | < 0.0001                |
| 2.3_5 vs. 2.3_10       | -85.00                           | -506.0 to 336.0                       | No                      | ns                              | 0.8939                  |
| 2.3_5 vs. 2.3_20       | 570.7                            | 149.7 to 991.6                        | Yes                     | *                               | 0.0132                  |
| 2.3_10 vs. 2.3_20      | 655.7                            | 234.7 to 1077                         | Yes                     | **                              | 0.0067                  |
| <b>2.3.D ANOVA</b>     | <b>SS (Type III)<sup>a</sup></b> | <b>DF<sup>b</sup></b>                 | <b>MS<sup>c</sup></b>   | <b>F (DFn, DFd)<sup>d</sup></b> | <b>P value</b>          |
| Replicate              | 751745                           | 2                                     | 375872                  | F (2, 6) = 2.317                | 0.1796                  |
| Treatment              | 397372169                        | 3                                     | 132457390               | F (3, 6) = 816.6                | < 0.0001                |
| <b>2.3.D Tukey's</b>   | <b>Mean Diff.<sup>e</sup></b>    | <b>95.00% CI of diff.<sup>f</sup></b> | <b>Below threshold?</b> | <b>Summary<sup>g</sup></b>      | <b>Adjusted P Value</b> |
| Control vs. 2.3.D_7.5  | 13272                            | 12134 to 14411                        | Yes                     | ****                            | < 0.0001                |
| Control vs. 2.3.D_15   | 13396                            | 12258 to 14535                        | Yes                     | ****                            | < 0.0001                |
| Control vs. 2.3.D_30   | 13197                            | 12058 to 14335                        | Yes                     | ****                            | < 0.0001                |
| 2.3.D_7.5 vs. 2.3.D_15 | 124.0                            | -1014 to 1262                         | No                      | ns                              | 0.9801                  |
| 2.3.D_7.5 vs. 2.3.D_30 | -75.67                           | -1214 to 1063                         | No                      | ns                              | 0.9952                  |
| 2.3.D_15 vs. 2.3.D_30  | -199.7                           | -1338 to 938.7                        | No                      | ns                              | 0.9261                  |

<sup>a</sup> Partial (non-sequential) Sum of Squares <sup>b</sup> Degrees of Freedom <sup>c</sup> Mean Squares <sup>d</sup> F ratios based on Degrees of Freedom. n = numerator, d = denominator <sup>e</sup> Difference from the control mean. Negative values indicate enhanced growth and positive values indicate reduced growth. <sup>f</sup> Confidence interval (CI) of difference from control <sup>g</sup> Not significant (ns) > 0.05, \*  $P \leq 0.05$ , \*\*  $P \leq 0.01$ , \*\*\*  $P \leq 0.001$ , \*\*\*\*  $P \leq 0.0001$ .

**Table S19.** Results of two-way ANOVA and Tukey's test comparing LA3 control IDTs with each VOC combination treatment.

| <b>3.D ANOVA</b>       | <b>SS (Type III)<sup>a</sup></b> | <b>DF<sup>b</sup></b>                 | <b>MS<sup>c</sup></b>   | <b>F (DFn, DFd)<sup>d</sup></b> | <b>P value</b>          |
|------------------------|----------------------------------|---------------------------------------|-------------------------|---------------------------------|-------------------------|
| Replicate              | 1711754773                       | 2                                     | 855877387               | F (2, 6) = 4.229                | 0.0715                  |
| Treatment              | 3665077303                       | 3                                     | 1221692434              | F (3, 6) = 6.037                | 0.0304                  |
| <b>3.D Tukey's</b>     | <b>Mean Diff.<sup>e</sup></b>    | <b>95.00% CI of diff.<sup>f</sup></b> | <b>Below threshold?</b> | <b>Summary<sup>g</sup></b>      | <b>Adjusted P Value</b> |
| Control vs. 3.D_5      | -48769                           | -88978 to -8560                       | Yes                     | *                               | 0.0220                  |
| Control vs. 3.D_10     | -31359                           | -71568 to 8851                        | No                      | ns                              | 0.1234                  |
| Control vs. 3.D_20     | -26429                           | -66639 to 13780                       | No                      | ns                              | 0.2059                  |
| 3.D_5 vs. 3.D_10       | 17410                            | -22799 to 57620                       | No                      | ns                              | 0.4925                  |
| 3.D_5 vs. 3.D_20       | 22340                            | -17870 to 62549                       | No                      | ns                              | 0.3113                  |
| 3.D_10 vs. 3.D_20      | 4929                             | -35280 to 45139                       | No                      | ns                              | 0.9722                  |
| <b>2.D ANOVA</b>       | <b>SS (Type III)<sup>a</sup></b> | <b>DF<sup>b</sup></b>                 | <b>MS<sup>c</sup></b>   | <b>F (DFn, DFd)<sup>d</sup></b> | <b>P value</b>          |
| Replicate              | 2312380580                       | 2                                     | 1156190290              | F (2, 6) = 1.351                | 0.3278                  |
| Treatment              | 5359199255                       | 3                                     | 1786399752              | F (3, 6) = 2.087                | 0.2034                  |
| <b>2.D Tukey's</b>     | <b>Mean Diff.<sup>e</sup></b>    | <b>95.00% CI of diff.<sup>f</sup></b> | <b>Below threshold?</b> | <b>Summary<sup>g</sup></b>      | <b>Adjusted P Value</b> |
| Control vs. 2.D_5      | -46742                           | -129433 to 35949                      | No                      | ns                              | 0.2996                  |
| Control vs. 2.D_10     | -53645                           | -136336 to 29046                      | No                      | ns                              | 0.2133                  |
| Control vs. 2.D_20     | -22943                           | -105634 to 59748                      | No                      | ns                              | 0.7757                  |
| 2.D_5 vs. 2.D_10       | -6902                            | -89593 to 75789                       | No                      | ns                              | 0.9907                  |
| 2.D_5 vs. 2.D_20       | 23799                            | -58892 to 106490                      | No                      | ns                              | 0.7573                  |
| 2.D_10 vs. 2.D_20      | 30701                            | -51990 to 113392                      | No                      | ns                              | 0.6028                  |
| <b>2.3 ANOVA</b>       | <b>SS (Type III)<sup>a</sup></b> | <b>DF<sup>b</sup></b>                 | <b>MS<sup>c</sup></b>   | <b>F (DFn, DFd)<sup>d</sup></b> | <b>P value</b>          |
| Replicate              | 2405430118                       | 2                                     | 1202715059              | F (2, 6) = 0.9115               | 0.4512                  |
| Treatment              | 7365004914                       | 3                                     | 2455001638              | F (3, 6) = 1.860                | 0.2371                  |
| <b>2.3 Tukey's</b>     | <b>Mean Diff.<sup>e</sup></b>    | <b>95.00% CI of diff.<sup>f</sup></b> | <b>Below threshold?</b> | <b>Summary<sup>g</sup></b>      | <b>Adjusted P Value</b> |
| Control vs. 2.3_5      | -68381                           | -171054 to 34293                      | No                      | ns                              | 0.1986                  |
| Control vs. 2.3_10     | -21860                           | -124534 to 80814                      | No                      | ns                              | 0.8789                  |
| Control vs. 2.3_20     | -25507                           | -128181 to 77167                      | No                      | ns                              | 0.8249                  |
| 2.3_5 vs. 2.3_10       | 46521                            | -56153 to 149194                      | No                      | ns                              | 0.4588                  |
| 2.3_5 vs. 2.3_20       | 42874                            | -59800 to 145547                      | No                      | ns                              | 0.5191                  |
| 2.3_10 vs. 2.3_20      | -3647                            | -106321 to 99027                      | No                      | ns                              | 0.9993                  |
| <b>2.3.D ANOVA</b>     | <b>SS (Type III)<sup>a</sup></b> | <b>DF<sup>b</sup></b>                 | <b>MS<sup>c</sup></b>   | <b>F (DFn, DFd)<sup>d</sup></b> | <b>P value</b>          |
| Replicate              | 796390435                        | 2                                     | 398195218               | F (2, 6) = 1.427                | 0.3112                  |
| Treatment              | 1487852804                       | 3                                     | 495950935               | F (3, 6) = 1.778                | 0.2512                  |
| <b>2.3.D Tukey's</b>   | <b>Mean Diff.<sup>e</sup></b>    | <b>95.00% CI of diff.<sup>f</sup></b> | <b>Below threshold?</b> | <b>Summary<sup>g</sup></b>      | <b>Adjusted P Value</b> |
| Control vs. 2.3.D_7.5  | -28367                           | -75579 to 18845                       | No                      | ns                              | 0.2596                  |
| Control vs. 2.3.D_15   | -22808                           | -70020 to 24404                       | No                      | ns                              | 0.4113                  |
| Control vs. 2.3.D_30   | -24720                           | -71932 to 22492                       | No                      | ns                              | 0.3528                  |
| 2.3.D_7.5 vs. 2.3.D_15 | 5559                             | -41653 to 52771                       | No                      | ns                              | 0.9752                  |
| 2.3.D_7.5 vs. 2.3.D_30 | 3647                             | -43565 to 50859                       | No                      | ns                              | 0.9926                  |
| 2.3.D_15 vs. 2.3.D_30  | -1912                            | -49124 to 45300                       | No                      | ns                              | 0.9989                  |

<sup>a</sup> Partial (non-sequential) Sum of Squares <sup>b</sup> Degrees of Freedom <sup>c</sup> Mean Squares <sup>d</sup> F ratios based on Degrees of Freedom. n = numerator, d = denominator <sup>e</sup> Difference from the control mean. Negative values indicate enhanced growth and positive values indicate reduced growth. <sup>f</sup> Confidence interval (CI) of difference from control <sup>g</sup> Not significant (ns) > 0.05, \*  $P \leq 0.05$ , \*\*  $P \leq 0.01$ , \*\*\*  $P \leq 0.001$ , \*\*\*\*  $P \leq 0.0001$ .



**Table S20.** Results of two-way ANOVA and Tukey's test comparing LA4 control AFB<sub>1</sub> with each VOC combination treatment.

| <b>3.D ANOVA</b>       | <b>SS (Type III)<sup>a</sup></b> | <b>DF<sup>b</sup></b>                 | <b>MS<sup>c</sup></b>   | <b>F (DFn, DFd)<sup>d</sup></b> | <b>P value</b>          |
|------------------------|----------------------------------|---------------------------------------|-------------------------|---------------------------------|-------------------------|
| Replicate              | 935324193                        | 2                                     | 467662097               | F (2, 6) = 0.7290               | 0.5207                  |
| Treatment              | 11439353997                      | 3                                     | 3813117999              | F (3, 6) = 5.944                | 0.0314                  |
| <b>3.D Tukey's</b>     | <b>Mean Diff.<sup>e</sup></b>    | <b>95.00% CI of diff.<sup>f</sup></b> | <b>Below threshold?</b> | <b>Summary<sup>g</sup></b>      | <b>Adjusted P Value</b> |
| Control vs. 3.D_5      | 75410                            | 3820 to 147000                        | Yes                     | *                               | 0.0405                  |
| Control vs. 3.D_10     | 58672                            | -12918 to 130262                      | No                      | ns                              | 0.1046                  |
| Control vs. 3.D_20     | 74732                            | 3142 to 146322                        | Yes                     | *                               | 0.0420                  |
| 3.D_5 vs. 3.D_10       | -16739                           | -88329 to 54851                       | No                      | ns                              | 0.8481                  |
| 3.D_5 vs. 3.D_20       | -678.7                           | -72269 to 70911                       | No                      | ns                              | > 0.9999                |
| 3.D_10 vs. 3.D_20      | 16060                            | -55530 to 87650                       | No                      | ns                              | 0.8625                  |
| <b>2.D ANOVA</b>       | <b>SS (Type III)<sup>a</sup></b> | <b>DF<sup>b</sup></b>                 | <b>MS<sup>c</sup></b>   | <b>F (DFn, DFd)<sup>d</sup></b> | <b>P value</b>          |
| Replicate              | 234845805                        | 2                                     | 117422903               | F (2, 6) = 0.5454               | 0.6059                  |
| Treatment              | 27694324934                      | 3                                     | 9231441645              | F (3, 6) = 42.88                | 0.0002                  |
| <b>2.D Tukey's</b>     | <b>Mean Diff.<sup>e</sup></b>    | <b>95.00% CI of diff.<sup>f</sup></b> | <b>Below threshold?</b> | <b>Summary<sup>g</sup></b>      | <b>Adjusted P Value</b> |
| Control vs. 2.D_5      | 116682                           | 75208 to 158156                       | Yes                     | ***                             | 0.0003                  |
| Control vs. 2.D_10     | 102057                           | 60583 to 143530                       | Yes                     | ***                             | 0.0006                  |
| Control vs. 2.D_20     | 112072                           | 70598 to 153545                       | Yes                     | ***                             | 0.0004                  |
| 2.D_5 vs. 2.D_10       | -14625                           | -56099 to 26848                       | No                      | ns                              | 0.6375                  |
| 2.D_5 vs. 2.D_20       | -4610                            | -46084 to 36863                       | No                      | ns                              | 0.9789                  |
| 2.D_10 vs. 2.D_20      | 10015                            | -31459 to 51489                       | No                      | ns                              | 0.8361                  |
| <b>2.3 ANOVA</b>       | <b>SS (Type III)<sup>a</sup></b> | <b>DF<sup>b</sup></b>                 | <b>MS<sup>c</sup></b>   | <b>F (DFn, DFd)<sup>d</sup></b> | <b>P value</b>          |
| Replicate              | 210896352                        | 2                                     | 105448176               | F (2, 6) = 2.050                | 0.2097                  |
| Treatment              | 34704751940                      | 3                                     | 11568250647             | F (3, 6) = 224.9                | < 0.0001                |
| <b>2.3 Tukey's</b>     | <b>Mean Diff.<sup>e</sup></b>    | <b>95.00% CI of diff.<sup>f</sup></b> | <b>Below threshold?</b> | <b>Summary<sup>g</sup></b>      | <b>Adjusted P Value</b> |
| Control vs. 2.3_5      | 118646                           | 98373 to 138919                       | Yes                     | ****                            | < 0.0001                |
| Control vs. 2.3_10     | 125343                           | 105070 to 145616                      | Yes                     | ****                            | < 0.0001                |
| Control vs. 2.3_20     | 127863                           | 107590 to 148136                      | Yes                     | ****                            | < 0.0001                |
| 2.3_5 vs. 2.3_10       | 6697                             | -13576 to 26970                       | No                      | ns                              | 0.6792                  |
| 2.3_5 vs. 2.3_20       | 9217                             | -11056 to 29490                       | No                      | ns                              | 0.4563                  |
| 2.3_10 vs. 2.3_20      | 2520                             | -17753 to 22793                       | No                      | ns                              | 0.9711                  |
| <b>2.3.D ANOVA</b>     | <b>SS (Type III)<sup>a</sup></b> | <b>DF<sup>b</sup></b>                 | <b>MS<sup>c</sup></b>   | <b>F (DFn, DFd)<sup>d</sup></b> | <b>P value</b>          |
| Replicate              | 14481661                         | 2                                     | 7240830                 | F (2, 6) = 0.03549              | 0.9653                  |
| Treatment              | 12331820791                      | 3                                     | 4110606930              | F (3, 6) = 20.15                | 0.0016                  |
| <b>2.3.D Tukey's</b>   | <b>Mean Diff.<sup>e</sup></b>    | <b>95.00% CI of diff.<sup>f</sup></b> | <b>Below threshold?</b> | <b>Summary<sup>g</sup></b>      | <b>Adjusted P Value</b> |
| Control vs. 2.3.D_7.5  | 87299                            | 46925 to 127673                       | Yes                     | **                              | 0.0012                  |
| Control vs. 2.3.D_15   | 63576                            | 23202 to 103950                       | Yes                     | **                              | 0.0064                  |
| Control vs. 2.3.D_30   | 57159                            | 16785 to 97533                        | Yes                     | *                               | 0.0107                  |
| 2.3.D_7.5 vs. 2.3.D_15 | -23723                           | -64097 to 16651                       | No                      | ns                              | 0.2739                  |
| 2.3.D_7.5 vs. 2.3.D_30 | -30140                           | -70514 to 10234                       | No                      | ns                              | 0.1419                  |
| 2.3.D_15 vs. 2.3.D_30  | -6417                            | -46791 to 33957                       | No                      | ns                              | 0.9432                  |

<sup>a</sup> Partial (non-sequential) Sum of Squares <sup>b</sup> Degrees of Freedom <sup>c</sup> Mean Squares <sup>d</sup> F ratios based on Degrees of Freedom. n = numerator, d = denominator <sup>e</sup> Difference from the control mean. Negative values indicate enhanced growth and positive values indicate reduced growth. <sup>f</sup> Confidence interval (CI) of difference from control <sup>g</sup> Not significant (ns) > 0.05, \*  $P \leq 0.05$ , \*\*  $P \leq 0.01$ , \*\*\*  $P \leq 0.001$ , \*\*\*\*  $P \leq 0.0001$ .

**Table S21.** Results of two-way ANOVA and Tukey's test comparing LA4 control AFB<sub>2</sub> with each VOC combination treatment.

| <b>3.D ANOVA</b>       | <b>SS (Type III)<sup>a</sup></b> | <b>DF<sup>b</sup></b>                 | <b>MS<sup>c</sup></b>   | <b>F (DFn, DFd)<sup>d</sup></b> | <b>P value</b>          |
|------------------------|----------------------------------|---------------------------------------|-------------------------|---------------------------------|-------------------------|
| Replicate              | 1863006                          | 2                                     | 931503                  | F (2, 6) = 2.072                | 0.2070                  |
| Treatment              | 4392920                          | 3                                     | 1464307                 | F (3, 6) = 3.256                | 0.1017                  |
| <b>3.D Tukey's</b>     | <b>Mean Diff.<sup>e</sup></b>    | <b>95.00% CI of diff.<sup>f</sup></b> | <b>Below threshold?</b> | <b>Summary<sup>g</sup></b>      | <b>Adjusted P Value</b> |
| Control vs. 3.D_5      | 1524                             | -371.4 to 3419                        | No                      | ns                              | 0.1116                  |
| Control vs. 3.D_10     | 1186                             | -709.7 to 3081                        | No                      | ns                              | 0.2347                  |
| Control vs. 3.D_20     | 1398                             | -497.7 to 3293                        | No                      | ns                              | 0.1474                  |
| 3.D_5 vs. 3.D_10       | -338.3                           | -2234 to 1557                         | No                      | ns                              | 0.9227                  |
| 3.D_5 vs. 3.D_20       | -126.3                           | -2022 to 1769                         | No                      | ns                              | 0.9952                  |
| 3.D_10 vs. 3.D_20      | 212.0                            | -1683 to 2107                         | No                      | ns                              | 0.9785                  |
| <b>2.D ANOVA</b>       | <b>SS (Type III)<sup>a</sup></b> | <b>DF<sup>b</sup></b>                 | <b>MS<sup>c</sup></b>   | <b>F (DFn, DFd)<sup>d</sup></b> | <b>P value</b>          |
| Replicate              | 22261                            | 2                                     | 11131                   | F (2, 6) = 0.02687              | 0.9736                  |
| Treatment              | 10689835                         | 3                                     | 3563278                 | F (3, 6) = 8.601                | 0.0136                  |
| <b>2.D Tukey's</b>     | <b>Mean Diff.<sup>e</sup></b>    | <b>95.00% CI of diff.<sup>f</sup></b> | <b>Below threshold?</b> | <b>Summary<sup>g</sup></b>      | <b>Adjusted P Value</b> |
| Control vs. 2.D_5      | 2271                             | 451.7 to 4090                         | Yes                     | *                               | 0.0194                  |
| Control vs. 2.D_10     | 2045                             | 226.0 to 3865                         | Yes                     | *                               | 0.0308                  |
| Control vs. 2.D_20     | 2198                             | 379.0 to 4018                         | Yes                     | *                               | 0.0224                  |
| 2.D_5 vs. 2.D_10       | -225.7                           | -2045 to 1594                         | No                      | ns                              | 0.9712                  |
| 2.D_5 vs. 2.D_20       | -72.67                           | -1892 to 1747                         | No                      | ns                              | 0.9989                  |
| 2.D_10 vs. 2.D_20      | 153.0                            | -1666 to 1972                         | No                      | ns                              | 0.9905                  |
| <b>2.3 ANOVA</b>       | <b>SS (Type III)<sup>a</sup></b> | <b>DF<sup>b</sup></b>                 | <b>MS<sup>c</sup></b>   | <b>F (DFn, DFd)<sup>d</sup></b> | <b>P value</b>          |
| Replicate              | 106840                           | 2                                     | 53420                   | F (2, 6) = 0.2407               | 0.7933                  |
| Treatment              | 15368467                         | 3                                     | 5122822                 | F (3, 6) = 23.08                | 0.0011                  |
| <b>2.3 Tukey's</b>     | <b>Mean Diff.<sup>e</sup></b>    | <b>95.00% CI of diff.<sup>f</sup></b> | <b>Below threshold?</b> | <b>Summary<sup>g</sup></b>      | <b>Adjusted P Value</b> |
| Control vs. 2.3_5      | 2568                             | 1236 to 3899                          | Yes                     | **                              | 0.0022                  |
| Control vs. 2.3_10     | 2647                             | 1315 to 3978                          | Yes                     | **                              | 0.0019                  |
| Control vs. 2.3_20     | 2624                             | 1292 to 3955                          | Yes                     | **                              | 0.0020                  |
| 2.3_5 vs. 2.3_10       | 79.00                            | -1253 to 1411                         | No                      | ns                              | 0.9966                  |
| 2.3_5 vs. 2.3_20       | 56.00                            | -1276 to 1388                         | No                      | ns                              | 0.9988                  |
| 2.3_10 vs. 2.3_20      | -23.00                           | -1355 to 1309                         | No                      | ns                              | > 0.9999                |
| <b>2.3.D ANOVA</b>     | <b>SS (Type III)<sup>a</sup></b> | <b>DF<sup>b</sup></b>                 | <b>MS<sup>c</sup></b>   | <b>F (DFn, DFd)<sup>d</sup></b> | <b>P value</b>          |
| Replicate              | 405227                           | 2                                     | 202613                  | F (2, 6) = 0.8784               | 0.4628                  |
| Treatment              | 6055608                          | 3                                     | 2018536                 | F (3, 6) = 8.751                | 0.0131                  |
| <b>2.3.D Tukey's</b>   | <b>Mean Diff.<sup>e</sup></b>    | <b>95.00% CI of diff.<sup>f</sup></b> | <b>Below threshold?</b> | <b>Summary<sup>g</sup></b>      | <b>Adjusted P Value</b> |
| Control vs. 2.3.D_7.5  | 1881                             | 523.5 to 3238                         | Yes                     | *                               | 0.0119                  |
| Control vs. 2.3.D_15   | 1452                             | 94.21 to 2809                         | Yes                     | *                               | 0.0380                  |
| Control vs. 2.3.D_30   | 1428                             | 70.21 to 2785                         | Yes                     | *                               | 0.0407                  |
| 2.3.D_7.5 vs. 2.3.D_15 | -429.3                           | -1787 to 928.1                        | No                      | ns                              | 0.7053                  |
| 2.3.D_7.5 vs. 2.3.D_30 | -453.3                           | -1811 to 904.1                        | No                      | ns                              | 0.6724                  |
| 2.3.D_15 vs. 2.3.D_30  | -24.00                           | -1381 to 1333                         | No                      | ns                              | > 0.9999                |

<sup>a</sup> Partial (non-sequential) Sum of Squares <sup>b</sup> Degrees of Freedom <sup>c</sup> Mean Squares <sup>d</sup> F ratios based on Degrees of Freedom. n = numerator, d = denominator <sup>e</sup> Difference from the control mean. Negative values indicate enhanced growth and positive values indicate reduced growth. <sup>f</sup> Confidence interval (CI) of difference from control <sup>g</sup> Not significant (ns) > 0.05, \*  $P \leq 0.05$ , \*\*  $P \leq 0.01$ , \*\*\*  $P \leq 0.001$ , \*\*\*\*  $P \leq 0.0001$ .

**Table S22.** Results of two-way ANOVA and Tukey's test comparing LA4 control AFG<sub>1</sub> with each VOC combination treatment.

| <b>3.D ANOVA</b>       | <b>SS (Type III)<sup>a</sup></b> | <b>DF<sup>b</sup></b>                 | <b>MS<sup>c</sup></b>   | <b>F (DFn, DFd)<sup>d</sup></b> | <b>P value</b>          |
|------------------------|----------------------------------|---------------------------------------|-------------------------|---------------------------------|-------------------------|
| Replicate              | 383900665                        | 2                                     | 191950332               | F (2, 6) = 1.630                | 0.2720                  |
| Treatment              | 17363865354                      | 3                                     | 5787955118              | F (3, 6) = 49.16                | 0.0001                  |
| <b>3.D Tukey's</b>     | <b>Mean Diff.<sup>e</sup></b>    | <b>95.00% CI of diff.<sup>f</sup></b> | <b>Below threshold?</b> | <b>Summary<sup>g</sup></b>      | <b>Adjusted P Value</b> |
| Control vs. 3.D_5      | 87641                            | 56973 to 118309                       | Yes                     | ***                             | 0.0003                  |
| Control vs. 3.D_10     | 88188                            | 57520 to 118856                       | Yes                     | ***                             | 0.0002                  |
| Control vs. 3.D_20     | 87710                            | 57042 to 118378                       | Yes                     | ***                             | 0.0003                  |
| 3.D_5 vs. 3.D_10       | 547.0                            | -30121 to 31215                       | No                      | ns                              | > 0.9999                |
| 3.D_5 vs. 3.D_20       | 69.00                            | -30599 to 30737                       | No                      | ns                              | > 0.9999                |
| 3.D_10 vs. 3.D_20      | -478.0                           | -31146 to 30190                       | No                      | ns                              | > 0.9999                |
| <b>2.D ANOVA</b>       | <b>SS (Type III)<sup>a</sup></b> | <b>DF<sup>b</sup></b>                 | <b>MS<sup>c</sup></b>   | <b>F (DFn, DFd)<sup>d</sup></b> | <b>P value</b>          |
| Replicate              | 92802172                         | 2                                     | 46401086                | F (2, 6) = 0.1350               | 0.8763                  |
| Treatment              | 11410487271                      | 3                                     | 3803495757              | F (3, 6) = 11.06                | 0.0074                  |
| <b>2.D Tukey's</b>     | <b>Mean Diff.<sup>e</sup></b>    | <b>95.00% CI of diff.<sup>f</sup></b> | <b>Below threshold?</b> | <b>Summary<sup>g</sup></b>      | <b>Adjusted P Value</b> |
| Control vs. 2.D_5      | 79531                            | 27121 to 131941                       | Yes                     | **                              | 0.0077                  |
| Control vs. 2.D_10     | 63592                            | 11181 to 116002                       | Yes                     | *                               | 0.0220                  |
| Control vs. 2.D_20     | 66414                            | 14004 to 118824                       | Yes                     | *                               | 0.0181                  |
| 2.D_5 vs. 2.D_10       | -15939                           | -68350 to 36471                       | No                      | ns                              | 0.7277                  |
| 2.D_5 vs. 2.D_20       | -13117                           | -65527 to 39293                       | No                      | ns                              | 0.8219                  |
| 2.D_10 vs. 2.D_20      | 2822                             | -49588 to 55233                       | No                      | ns                              | 0.9974                  |
| <b>2.3 ANOVA</b>       | <b>SS (Type III)<sup>a</sup></b> | <b>DF<sup>b</sup></b>                 | <b>MS<sup>c</sup></b>   | <b>F (DFn, DFd)<sup>d</sup></b> | <b>P value</b>          |
| Replicate              | 39512712                         | 2                                     | 19756356                | F (2, 6) = 0.2663               | 0.7748                  |
| Treatment              | 14895637343                      | 3                                     | 4965212448              | F (3, 6) = 66.93                | < 0.0001                |
| <b>2.3 Tukey's</b>     | <b>Mean Diff.<sup>e</sup></b>    | <b>95.00% CI of diff.<sup>f</sup></b> | <b>Below threshold?</b> | <b>Summary<sup>g</sup></b>      | <b>Adjusted P Value</b> |
| Control vs. 2.3_5      | 83683                            | 59338 to 108028                       | Yes                     | ****                            | < 0.0001                |
| Control vs. 2.3_10     | 77544                            | 53199 to 101889                       | Yes                     | ***                             | 0.0001                  |
| Control vs. 2.3_20     | 82354                            | 58009 to 106699                       | Yes                     | ****                            | < 0.0001                |
| 2.3_5 vs. 2.3_10       | -6139                            | -30484 to 18206                       | No                      | ns                              | 0.8188                  |
| 2.3_5 vs. 2.3_20       | -1329                            | -25674 to 23016                       | No                      | ns                              | 0.9973                  |
| 2.3_10 vs. 2.3_20      | 4810                             | -19535 to 29155                       | No                      | ns                              | 0.8996                  |
| <b>2.3.D ANOVA</b>     | <b>SS (Type III)<sup>a</sup></b> | <b>DF<sup>b</sup></b>                 | <b>MS<sup>c</sup></b>   | <b>F (DFn, DFd)<sup>d</sup></b> | <b>P value</b>          |
| Replicate              | 149500862                        | 2                                     | 74750431                | F (2, 6) = 0.5406               | 0.6083                  |
| Treatment              | 4829722547                       | 3                                     | 1609907516              | F (3, 6) = 11.64                | 0.0065                  |
| <b>2.3.D Tukey's</b>   | <b>Mean Diff.<sup>e</sup></b>    | <b>95.00% CI of diff.<sup>f</sup></b> | <b>Below threshold?</b> | <b>Summary<sup>g</sup></b>      | <b>Adjusted P Value</b> |
| Control vs. 2.3.D_7.5  | 54551                            | 21315 to 87787                        | Yes                     | **                              | 0.0052                  |
| Control vs. 2.3.D_15   | 40332                            | 7096 to 73569                         | Yes                     | *                               | 0.0220                  |
| Control vs. 2.3.D_30   | 34964                            | 1728 to 68200                         | Yes                     | *                               | 0.0407                  |
| 2.3.D_7.5 vs. 2.3.D_15 | -14219                           | -47455 to 19018                       | No                      | ns                              | 0.5014                  |
| 2.3.D_7.5 vs. 2.3.D_30 | -19587                           | -52823 to 13649                       | No                      | ns                              | 0.2720                  |
| 2.3.D_15 vs. 2.3.D_30  | -5368                            | -38605 to 27868                       | No                      | ns                              | 0.9406                  |

<sup>a</sup> Partial (non-sequential) Sum of Squares <sup>b</sup> Degrees of Freedom <sup>c</sup> Mean Squares <sup>d</sup> F ratios based on Degrees of Freedom. n = numerator, d = denominator <sup>e</sup> Difference from the control mean. Negative values indicate enhanced growth and positive values indicate reduced growth. <sup>f</sup> Confidence interval (CI) of difference from control <sup>g</sup> Not significant (ns) > 0.05, \*  $P \leq 0.05$ , \*\*  $P \leq 0.01$ , \*\*\*  $P \leq 0.001$ , \*\*\*\*  $P \leq 0.0001$ .

**Table S23.** Results of two-way ANOVA and Tukey's test comparing LA4 control AFG<sub>2</sub> with each VOC combination treatment.

| 3.D ANOVA              | SS (Type III) <sup>a</sup> | DF <sup>b</sup>                 | MS <sup>c</sup>  | F (DFn, DFd) <sup>d</sup> | P value          |
|------------------------|----------------------------|---------------------------------|------------------|---------------------------|------------------|
| Replicate              | 437657                     | 2                               | 218829           | F (2, 6) = 1.590          | 0.2791           |
| Treatment              | 2753268                    | 3                               | 917756           | F (3, 6) = 6.670          | 0.0244           |
| 3.D Tukey's            | Mean Diff. <sup>e</sup>    | 95.00% CI of diff. <sup>f</sup> | Below threshold? | Summary <sup>g</sup>      | Adjusted P Value |
| Control vs. 3.D_5      | 1141                       | 92.23 to 2189                   | Yes              | *                         | 0.0354           |
| Control vs. 3.D_10     | 1111                       | 62.90 to 2160                   | Yes              | *                         | 0.0394           |
| Control vs. 3.D_20     | 1061                       | 12.23 to 2109                   | Yes              | *                         | 0.0477           |
| 3.D_5 vs. 3.D_10       | -29.33                     | -1078 to 1019                   | No               | ns                        | 0.9996           |
| 3.D_5 vs. 3.D_20       | -80.00                     | -1128 to 968.4                  | No               | ns                        | 0.9929           |
| 3.D_10 vs. 3.D_20      | -50.67                     | -1099 to 997.8                  | No               | ns                        | 0.9981           |
| 2.D ANOVA              | SS (Type III) <sup>a</sup> | DF <sup>b</sup>                 | MS <sup>c</sup>  | F (DFn, DFd) <sup>d</sup> | P value          |
| Replicate              | 30513                      | 2                               | 15257            | F (2, 6) = 0.09246        | 0.9130           |
| Treatment              | 2838338                    | 3                               | 946113           | F (3, 6) = 5.734          | 0.0339           |
| 2.D Tukey's            | Mean Diff. <sup>e</sup>    | 95.00% CI of diff. <sup>f</sup> | Below threshold? | Summary <sup>g</sup>      | Adjusted P Value |
| Control vs. 2.D_5      | 1227                       | 79.20 to 2375                   | Yes              | *                         | 0.0381           |
| Control vs. 2.D_10     | 1039                       | -109.1 to 2187                  | No               | ns                        | 0.0735           |
| Control vs. 2.D_20     | 1066                       | -82.14 to 2214                  | No               | ns                        | 0.0667           |
| 2.D_5 vs. 2.D_10       | -188.3                     | -1336 to 959.8                  | No               | ns                        | 0.9381           |
| 2.D_5 vs. 2.D_20       | -161.3                     | -1309 to 986.8                  | No               | ns                        | 0.9593           |
| 2.D_10 vs. 2.D_20      | 27.00                      | -1121 to 1175                   | No               | ns                        | 0.9998           |
| 2.3 ANOVA              | SS (Type III) <sup>a</sup> | DF <sup>b</sup>                 | MS <sup>c</sup>  | F (DFn, DFd) <sup>d</sup> | P value          |
| Replicate              | 49651                      | 2                               | 24826            | F (2, 6) = 0.8313         | 0.4801           |
| Treatment              | 4362754                    | 3                               | 1454251          | F (3, 6) = 48.70          | 0.0001           |
| 2.3 Tukey's            | Mean Diff. <sup>e</sup>    | 95.00% CI of diff. <sup>f</sup> | Below threshold? | Summary <sup>g</sup>      | Adjusted P Value |
| Control vs. 2.3_5      | 1506                       | 1018 to 1995                    | Yes              | ***                       | 0.0002           |
| Control vs. 2.3_10     | 1238                       | 749.6 to 1726                   | Yes              | ***                       | 0.0005           |
| Control vs. 2.3_20     | 1381                       | 892.6 to 1869                   | Yes              | ***                       | 0.0003           |
| 2.3_5 vs. 2.3_10       | -268.3                     | -756.8 to 220.1                 | No               | ns                        | 0.3190           |
| 2.3_5 vs. 2.3_20       | -125.3                     | -613.8 to 363.1                 | No               | ns                        | 0.8114           |
| 2.3_10 vs. 2.3_20      | 143.0                      | -345.4 to 631.4                 | No               | ns                        | 0.7484           |
| 2.3.D ANOVA            | SS (Type III) <sup>a</sup> | DF <sup>b</sup>                 | MS <sup>c</sup>  | F (DFn, DFd) <sup>d</sup> | P value          |
| Replicate              | 127373                     | 2                               | 63687            | F (2, 6) = 0.4603         | 0.6517           |
| Treatment              | 2394818                    | 3                               | 798273           | F (3, 6) = 5.770          | 0.0335           |
| 2.3.D Tukey's          | Mean Diff. <sup>e</sup>    | 95.00% CI of diff. <sup>f</sup> | Below threshold? | Summary <sup>g</sup>      | Adjusted P Value |
| Control vs. 2.3.D_7.5  | 1133                       | 81.67 to 2184                   | Yes              | *                         | 0.0368           |
| Control vs. 2.3.D_15   | 1040                       | -11.67 to 2091                  | No               | ns                        | 0.0523           |
| Control vs. 2.3.D_30   | 822.0                      | -229.3 to 1873                  | No               | ns                        | 0.1224           |
| 2.3.D_7.5 vs. 2.3.D_15 | -93.33                     | -1145 to 958.0                  | No               | ns                        | 0.9889           |
| 2.3.D_7.5 vs. 2.3.D_30 | -311.0                     | -1362 to 740.3                  | No               | ns                        | 0.7429           |
| 2.3.D_15 vs. 2.3.D_30  | -217.7                     | -1269 to 833.7                  | No               | ns                        | 0.8871           |

<sup>a</sup> Partial (non-sequential) Sum of Squares <sup>b</sup> Degrees of Freedom <sup>c</sup> Mean Squares. <sup>d</sup> F ratios based on Degrees of Freedom. n = numerator, d = denominator <sup>e</sup> Difference from the control mean. Negative values indicate enhanced growth and positive values indicate reduced growth. <sup>f</sup> Confidence interval (CI) of difference from control <sup>g</sup> Not significant (ns) > 0.05, \*  $P \leq 0.05$ , \*\*  $P \leq 0.01$ , \*\*\*  $P \leq 0.001$ , \*\*\*\*  $P \leq 0.0001$

**Table S24.** Results of two-way ANOVA and Tukey's test comparing LA4 control CPA with each VOC combination treatment.

| <b>3.D ANOVA</b>       | <b>SS (Type III)<sup>a</sup></b> | <b>DF<sup>b</sup></b>                 | <b>MS<sup>c</sup></b>   | <b>F (DFn, DFd)<sup>d</sup></b> | <b>P value</b>          |
|------------------------|----------------------------------|---------------------------------------|-------------------------|---------------------------------|-------------------------|
| Replicate              | 118847                           | 2                                     | 59424                   | F (2, 6) = 1.246                | 0.3527                  |
| Treatment              | 42508245                         | 3                                     | 14169415                | F (3, 6) = 297.1                | < 0.0001                |
| <b>3.D Tukey's</b>     | <b>Mean Diff.<sup>e</sup></b>    | <b>95.00% CI of diff.<sup>f</sup></b> | <b>Below threshold?</b> | <b>Summary<sup>g</sup></b>      | <b>Adjusted P Value</b> |
| Control vs. 3.D_5      | 4293                             | 3676 to 4911                          | Yes                     | ****                            | < 0.0001                |
| Control vs. 3.D_10     | 4312                             | 3695 to 4929                          | Yes                     | ****                            | < 0.0001                |
| Control vs. 3.D_20     | 4429                             | 3812 to 5047                          | Yes                     | ****                            | < 0.0001                |
| 3.D_5 vs. 3.D_10       | 18.67                            | -598.6 to 635.9                       | No                      | ns                              | 0.9995                  |
| 3.D_5 vs. 3.D_20       | 136.0                            | -481.2 to 753.2                       | No                      | ns                              | 0.8683                  |
| 3.D_10 vs. 3.D_20      | 117.3                            | -499.9 to 734.6                       | No                      | ns                              | 0.9090                  |
| <b>2.D ANOVA</b>       | <b>SS (Type III)<sup>a</sup></b> | <b>DF<sup>b</sup></b>                 | <b>MS<sup>c</sup></b>   | <b>F (DFn, DFd)<sup>d</sup></b> | <b>P value</b>          |
| Replicate              | 25554                            | 2                                     | 12777                   | F (2, 6) = 0.1133               | 0.8948                  |
| Treatment              | 41505294                         | 3                                     | 13835098                | F (3, 6) = 122.6                | < 0.0001                |
| <b>2.D Tukey's</b>     | <b>Mean Diff.<sup>e</sup></b>    | <b>95.00% CI of diff.<sup>f</sup></b> | <b>Below threshold?</b> | <b>Summary<sup>g</sup></b>      | <b>Adjusted P Value</b> |
| Control vs. 2.D_5      | 4363                             | 3414 to 5312                          | Yes                     | ****                            | <0.0001                 |
| Control vs. 2.D_10     | 4223                             | 3273 to 5172                          | Yes                     | ****                            | <0.0001                 |
| Control vs. 2.D_20     | 4295                             | 3345 to 5244                          | Yes                     | ****                            | <0.0001                 |
| 2.D_5 vs. 2.D_10       | -140.3                           | -1090 to 809.0                        | No                      | ns                              | 0.9533                  |
| 2.D_5 vs. 2.D_20       | -68.33                           | -1018 to 881.0                        | No                      | ns                              | 0.9940                  |
| 2.D_10 vs. 2.D_20      | 72.00                            | -877.4 to 1021                        | No                      | ns                              | 0.9930                  |
| <b>2.3 ANOVA</b>       | <b>SS (Type III)<sup>a</sup></b> | <b>DF<sup>b</sup></b>                 | <b>MS<sup>c</sup></b>   | <b>F (DFn, DFd)<sup>d</sup></b> | <b>P value</b>          |
| Replicate              | 73200                            | 2                                     | 36600                   | F (2, 6) = 0.8704               | 0.4657                  |
| Treatment              | 53043981                         | 3                                     | 17681327                | F (3, 6) = 420.5                | < 0.0001                |
| <b>2.3 Tukey's</b>     | <b>Mean Diff.<sup>e</sup></b>    | <b>95.00% CI of diff.<sup>f</sup></b> | <b>Below threshold?</b> | <b>Summary<sup>g</sup></b>      | <b>Adjusted P Value</b> |
| Control vs. 2.3_5      | 4862                             | 4282 to 5442                          | Yes                     | ****                            | <0.0001                 |
| Control vs. 2.3_10     | 4819                             | 4239 to 5398                          | Yes                     | ****                            | <0.0001                 |
| Control vs. 2.3_20     | 4885                             | 4305 to 5464                          | Yes                     | ****                            | <0.0001                 |
| 2.3_5 vs. 2.3_10       | -43.33                           | -622.9 to 536.3                       | No                      | ns                              | 0.9933                  |
| 2.3_5 vs. 2.3_20       | 22.67                            | -556.9 to 602.3                       | No                      | ns                              | 0.9990                  |
| 2.3_10 vs. 2.3_20      | 66.00                            | -513.6 to 645.6                       | No                      | ns                              | 0.9774                  |
| <b>2.3.D ANOVA</b>     | <b>SS (Type III)<sup>a</sup></b> | <b>DF<sup>b</sup></b>                 | <b>MS<sup>c</sup></b>   | <b>F (DFn, DFd)<sup>d</sup></b> | <b>P value</b>          |
| Replicate              | 2068945                          | 2                                     | 1034472                 | F (2, 6) = 1.673                | 0.2646                  |
| Treatment              | 27905277                         | 3                                     | 9301759                 | F (3, 6) = 15.04                | 0.0034                  |
| <b>2.3.D Tukey's</b>   | <b>Mean Diff.<sup>e</sup></b>    | <b>95.00% CI of diff.<sup>f</sup></b> | <b>Below threshold?</b> | <b>Summary<sup>g</sup></b>      | <b>Adjusted P Value</b> |
| Control vs. 2.3.D_7.5  | 3677                             | 1455 to 5900                          | Yes                     | **                              | 0.0050                  |
| Control vs. 2.3.D_15   | 480.3                            | -1742 to 2703                         | No                      | ns                              | 0.8744                  |
| Control vs. 2.3.D_30   | 2708                             | 485.2 to 4930                         | Yes                     | *                               | 0.0216                  |
| 2.3.D_7.5 vs. 2.3.D_15 | -3197                            | -5419 to -974.6                       | Yes                     | **                              | 0.0099                  |
| 2.3.D_7.5 vs. 2.3.D_30 | -969.7                           | -3192 to 1253                         | No                      | ns                              | 0.4868                  |
| 2.3.D_15 vs. 2.3.D_30  | 2227                             | 4.885 to 4450                         | Yes                     | *                               | 0.0496                  |

<sup>a</sup> Partial (non-sequential) Sum of Squares <sup>b</sup> Degrees of Freedom <sup>c</sup> Mean Squares <sup>d</sup> F ratios based on Degrees of Freedom. n = numerator, d = denominator <sup>e</sup> Difference from the control mean. Negative values indicate enhanced growth and positive values indicate reduced growth. <sup>f</sup> Confidence interval (CI) of difference from control <sup>g</sup> Not significant (ns) > 0.05, \*  $P \leq 0.05$ , \*\*  $P \leq 0.01$ , \*\*\*  $P \leq 0.001$ , \*\*\*\*  $P \leq 0.0001$ .

**Table S25.** Results of two-way ANOVA and Tukey's test comparing LA4 control IDTs with each VOC combination treatment.

| <b>3.D ANOVA</b>       | <b>SS (Type III)<sup>a</sup></b> | <b>DF<sup>b</sup></b>                 | <b>MS<sup>c</sup></b>   | <b>F (DFn, DFd)<sup>d</sup></b> | <b>P value</b>          |
|------------------------|----------------------------------|---------------------------------------|-------------------------|---------------------------------|-------------------------|
| Replicate              | 513183                           | 2                                     | 256592                  | F (2, 6) = 1.060                | 0.4034                  |
| Treatment              | 1290940                          | 3                                     | 430313                  | F (3, 6) = 1.778                | 0.2511                  |
| <b>3.D Tukey's</b>     | <b>Mean Diff.<sup>e</sup></b>    | <b>95.00% CI of diff.<sup>f</sup></b> | <b>Below threshold?</b> | <b>Summary<sup>g</sup></b>      | <b>Adjusted P Value</b> |
| Control vs. 3.D_5      | -770.7                           | -2161 to 619.8                        | No                      | ns                              | 0.3129                  |
| Control vs. 3.D_10     | -66.00                           | -1456 to 1324                         | No                      | ns                              | 0.9982                  |
| Control vs. 3.D_20     | 16.33                            | -1374 to 1407                         | No                      | ns                              | > 0.9999                |
| 3.D_5 vs. 3.D_10       | 704.7                            | -685.8 to 2095                        | No                      | ns                              | 0.3763                  |
| 3.D_5 vs. 3.D_20       | 787.0                            | -603.4 to 2177                        | No                      | ns                              | 0.2987                  |
| 3.D_10 vs. 3.D_20      | 82.33                            | -1308 to 1473                         | No                      | ns                              | 0.9966                  |
| <b>2.D ANOVA</b>       | <b>SS (Type III)<sup>a</sup></b> | <b>DF<sup>b</sup></b>                 | <b>MS<sup>c</sup></b>   | <b>F (DFn, DFd)<sup>d</sup></b> | <b>P value</b>          |
| Replicate              | 1541607                          | 2                                     | 770804                  | F (2, 6) = 1.413                | 0.3142                  |
| Treatment              | 2800040                          | 3                                     | 933347                  | F (3, 6) = 1.711                | 0.2634                  |
| <b>2.D Tukey's</b>     | <b>Mean Diff.<sup>e</sup></b>    | <b>95.00% CI of diff.<sup>f</sup></b> | <b>Below threshold?</b> | <b>Summary<sup>g</sup></b>      | <b>Adjusted P Value</b> |
| Control vs. 2.D_5      | -668.3                           | -2756 to 1419                         | No                      | ns                              | 0.6982                  |
| Control vs. 2.D_10     | -1143                            | -3231 to 944.3                        | No                      | ns                              | 0.3212                  |
| Control vs. 2.D_20     | 0.000                            | -2088 to 2088                         | No                      | ns                              | > 0.9999                |
| 2.D_5 vs. 2.D_10       | -475.0                           | -2563 to 1613                         | No                      | ns                              | 0.8577                  |
| 2.D_5 vs. 2.D_20       | 668.3                            | -1419 to 2756                         | No                      | ns                              | 0.6982                  |
| 2.D_10 vs. 2.D_20      | 1143                             | -944.3 to 3231                        | No                      | ns                              | 0.3212                  |
| <b>2.3 ANOVA</b>       | <b>SS (Type III)<sup>a</sup></b> | <b>DF<sup>b</sup></b>                 | <b>MS<sup>c</sup></b>   | <b>F (DFn, DFd)<sup>d</sup></b> | <b>P value</b>          |
| Replicate              | 685565                           | 2                                     | 342783                  | F (2, 6) = 6.303                | 0.0335                  |
| Treatment              | 222551                           | 3                                     | 74184                   | F (3, 6) = 1.364                | 0.3404                  |
| <b>2.3 Tukey's</b>     | <b>Mean Diff.<sup>e</sup></b>    | <b>95.00% CI of diff.<sup>f</sup></b> | <b>Below threshold?</b> | <b>Summary<sup>g</sup></b>      | <b>Adjusted P Value</b> |
| Control vs. 2.3_5      | 103.0                            | -556.2 to 762.2                       | No                      | ns                              | 0.9457                  |
| Control vs. 2.3_10     | -205.3                           | -864.5 to 453.8                       | No                      | ns                              | 0.7142                  |
| Control vs. 2.3_20     | -216.3                           | -875.5 to 442.8                       | No                      | ns                              | 0.6832                  |
| 2.3_5 vs. 2.3_10       | -308.3                           | -967.5 to 350.8                       | No                      | ns                              | 0.4352                  |
| 2.3_5 vs. 2.3_20       | -319.3                           | -978.5 to 339.8                       | No                      | ns                              | 0.4093                  |
| 2.3_10 vs. 2.3_20      | -11.00                           | -670.2 to 648.2                       | No                      | ns                              | > 0.9999                |
| <b>2.3.D ANOVA</b>     | <b>SS (Type III)<sup>a</sup></b> | <b>DF<sup>b</sup></b>                 | <b>MS<sup>c</sup></b>   | <b>F (DFn, DFd)<sup>d</sup></b> | <b>P value</b>          |
| Replicate              | 357708                           | 2                                     | 178854                  | F (2, 6) = 3.954                | 0.0803                  |
| Treatment              | 305847                           | 3                                     | 101949                  | F (3, 6) = 2.254                | 0.1825                  |
| <b>2.3.D Tukey's</b>   | <b>Mean Diff.<sup>e</sup></b>    | <b>95.00% CI of diff.<sup>f</sup></b> | <b>Below threshold?</b> | <b>Summary<sup>g</sup></b>      | <b>Adjusted P Value</b> |
| Control vs. 2.3.D_7.5  | 153.0                            | -448.1 to 754.1                       | No                      | ns                              | 0.8149                  |
| Control vs. 2.3.D_15   | 352.3                            | -248.8 to 953.5                       | No                      | ns                              | 0.2756                  |
| Control vs. 2.3.D_30   | 398.0                            | -203.1 to 999.1                       | No                      | ns                              | 0.2019                  |
| 2.3.D_7.5 vs. 2.3.D_15 | 199.3                            | -401.8 to 800.5                       | No                      | ns                              | 0.6768                  |
| 2.3.D_7.5 vs. 2.3.D_30 | 245.0                            | -356.1 to 846.1                       | No                      | ns                              | 0.5368                  |
| 2.3.D_15 vs. 2.3.D_30  | 45.67                            | -555.5 to 646.8                       | No                      | ns                              | 0.9930                  |

<sup>a</sup> Partial (non-sequential) Sum of Squares <sup>b</sup> Degrees of Freedom <sup>c</sup> Mean Squares <sup>d</sup> F ratios based on Degrees of Freedom. n = numerator, d = denominator <sup>e</sup> Difference from the control mean. Negative values indicate enhanced growth and positive values indicate reduced growth. <sup>f</sup> Confidence interval (CI) of difference from control <sup>g</sup> Not significant (ns) > 0.05, \*  $P \leq 0.05$ , \*\*  $P \leq 0.01$ , \*\*\*  $P \leq 0.001$ , \*\*\*\*  $P \leq 0.0001$ .
